# Supplementary material for: Cell type-specific DNA replication initiation and termination in human primary cancer whole genomes
Source: Research Square preprint supplement (doi:10.21203/rs.3.rs-3266108/v1), 2023-09-18
Supplement: Supplementary file 1 [file 0d1b9f7a948b6a41edd82ef1.xlsx]

## Sheet: Supplementary Table 1
Supplementary Table 1 | S-phase cell fraction (SCF) index in 2,769 primary tumours (as in Fig. 2a)
Histology_Abbreviation	Sample_ID	SCF
Skin-Melanoma	SP82445	-0.584323
Skin-Melanoma	SP83242	-0.715799
Skin-Melanoma	SP124389	-0.335888
Skin-Melanoma	SP124362	-0.721368
Skin-Melanoma	SP103894	-0.682621
Skin-Melanoma	SP124394	-0.328272
Skin-Melanoma	SP83382	-0.708217
Skin-Melanoma	SP124334	-0.763924
Skin-Melanoma	SP124339	-0.276698
Skin-Melanoma	SP82451	-0.354842
Skin-Melanoma	SP104330	-0.708012
Skin-Melanoma	SP124380	-0.746993
Skin-Melanoma	SP124273	-0.221582
Skin-Melanoma	SP124357	-0.73964
Skin-Melanoma	SP124399	-0.27466
Skin-Melanoma	SP124311	-0.246555
Skin-Melanoma	SP124355	-0.759633
Skin-Melanoma	SP124434	-0.737466
Skin-Melanoma	SP83312	-0.462314
Skin-Melanoma	SP82614	-0.36216
Skin-Melanoma	SP124428	-0.766135
Skin-Melanoma	SP124449	-0.37795
Skin-Melanoma	SP124298	-0.748652
Skin-Melanoma	SP124431	-0.714082
Skin-Melanoma	SP124396	-0.745507
Skin-Melanoma	SP124409	-0.755486
Skin-Melanoma	SP124341	-0.293619
Skin-Melanoma	SP124353	-0.773938
Skin-Melanoma	SP124278	-0.770891
Skin-Melanoma	SP82431	-0.560706
Skin-Melanoma	SP124376	-0.761402
Skin-Melanoma	SP82459	-0.184466
Skin-Melanoma	SP113197	-0.603943
Skin-Melanoma	SP82532	-0.554937
Skin-Melanoma	SP82636	-0.525835
Skin-Melanoma	SP124346	-0.247091
Skin-Melanoma	SP82796	-0.623277
Skin-Melanoma	SP124439	-0.287588
Skin-Melanoma	SP124351	-0.252863
Skin-Melanoma	SP83482	-0.701075
Skin-Melanoma	SP104530	-0.501315
Skin-Melanoma	SP124406	-0.347703
Skin-Melanoma	SP124323	-0.717527
Skin-Melanoma	SP124391	-0.253482
Skin-Melanoma	SP124423	-0.444764
Skin-Melanoma	SP124382	-0.700327
Skin-Melanoma	SP124415	-0.283303
Skin-Melanoma	SP124436	-0.476331
Skin-Melanoma	SP82429	-0.592168
Skin-Melanoma	SP82644	-0.680019
Skin-Melanoma	SP82988	-0.703136
Skin-Melanoma	SP124460	-0.43535
Skin-Melanoma	SP82461	-0.697861
Skin-Melanoma	SP124425	-0.413254
Skin-Melanoma	SP124456	-0.251329
Skin-Melanoma	SP124367	-0.440662
Skin-Melanoma	SP124281	-0.252028
Skin-Melanoma	SP82900	-0.187112
Skin-Melanoma	SP124377	-0.604282
Skin-Melanoma	SP124412	-0.777344
Skin-Melanoma	SP124333	-0.758469
Skin-Melanoma	SP124359	-0.751157
Skin-Melanoma	SP124286	-0.76071
Skin-Melanoma	SP124329	-0.773543
Skin-Melanoma	SP82399	-0.585528
Skin-Melanoma	SP124326	-0.289294
Skin-Melanoma	SP124458	-0.268267
Skin-Melanoma	SP82756	-0.671433
Skin-Melanoma	SP82836	-0.278909
Skin-Melanoma	SP82417	-0.160284
Skin-Melanoma	SP124401	-0.221456
Skin-Melanoma	SP124264	-0.225873
Skin-Melanoma	SP124384	-0.719113
Skin-Melanoma	SP82471	-0.707257
Skin-Melanoma	SP124403	-0.295091
Skin-Melanoma	SP124462	-0.353104
Skin-Melanoma	SP82435	-0.282512
Skin-Melanoma	SP104056	-0.695752
Skin-Melanoma	SP124271	-0.746102
Skin-Melanoma	SP124336	-0.759861
Skin-Melanoma	SP124452	-0.253014
Skin-Melanoma	SP124386	-0.221501
Skin-Melanoma	SP124441	-0.13663
Skin-Melanoma	SP83083	-0.478678
Skin-Melanoma	SP124418	-0.263202
Skin-Melanoma	SP124291	-0.121458
Skin-Melanoma	SP124319	-0.382079
Skin-Melanoma	SP82433	-0.64397
Skin-Melanoma	SP82780	-0.410809
Skin-Melanoma	SP83019	-0.636788
Skin-Melanoma	SP124305	-0.284692
Skin-Melanoma	SP83099	-0.492239
Skin-Melanoma	SP124447	-0.324819
Skin-Melanoma	SP124344	-0.284245
Skin-Melanoma	SP83146	-0.712239
Skin-Melanoma	SP124369	-0.287579
Skin-Melanoma	SP124348	-0.290444
Skin-Melanoma	SP124295	-0.742698
Skin-Melanoma	SP124444	-0.364558
Skin-Melanoma	SP124365	-0.313169
Skin-Melanoma	SP124420	-0.762041
Skin-Melanoma	SP124364	-0.407087
Skin-Melanoma	SP103866	-0.592248
Skin-Melanoma	SP124307	-0.350273
Skin-Melanoma	SP83844	-0.45247
Skin-Melanoma	SP83027	-0.66329
CNS-GBM	SP24708	0.516743
CNS-GBM	SP24301	-0.660156
CNS-GBM	SP27201	0.503194
CNS-GBM	SP28791	0.278795
CNS-GBM	SP24702	-0.730085
CNS-GBM	SP25332	-0.731593
CNS-GBM	SP28335	0.540042
CNS-GBM	SP26709	-0.468771
CNS-GBM	SP25350	0.59065
CNS-GBM	SP25380	-0.694916
CNS-GBM	SP24565	-0.720712
CNS-GBM	SP25833	0.45083
CNS-GBM	SP25905	0.718823
CNS-GBM	SP26439	0.690182
CNS-GBM	SP24236	-0.0394436
CNS-GBM	SP23925	-0.446385
CNS-GBM	SP24815	-0.484679
CNS-GBM	SP27957	-0.163419
CNS-GBM	SP27603	0.584329
CNS-GBM	SP27825	-0.742561
CNS-GBM	SP24135	-0.701757
CNS-GBM	SP26499	-0.716403
CNS-GBM	SP25518	0.411184
CNS-GBM	SP28659	-0.722657
CNS-GBM	SP23622	-0.741751
CNS-GBM	SP27939	-0.610255
CNS-GBM	SP23754	-0.69987
CNS-GBM	SP29697	0.0010481
CNS-GBM	SP27339	0.181332
CNS-GBM	SP29559	-0.688965
CNS-GBM	SP29331	-0.671902
CNS-GBM	SP26475	-0.709723
CNS-GBM	SP23775	-0.713282
CNS-GBM	SP28275	0.567317
CNS-GBM	SP28581	0.56951
CNS-GBM	SP23639	0.0822898
CNS-GBM	SP24391	-0.730446
CNS-GBM	SP28041	-0.594731
CNS-GBM	SP25494	-0.691344
CNS-GBM	SP26649	-0.515572
Kidney-RCC	SP43633	-0.734228
Kidney-RCC	SP102816	-0.365972
Kidney-RCC	SP36498	-0.722642
Kidney-RCC	SP102795	-0.281132
Kidney-RCC	SP103197	-0.355563
Kidney-RCC	SP102827	-0.3217
Kidney-RCC	SP37516	-0.722765
Kidney-RCC	SP43510	-0.742395
Kidney-RCC	SP39997	-0.731358
Kidney-RCC	SP35617	-0.710146
Kidney-RCC	SP103233	-0.472031
Kidney-RCC	SP43770	-0.739522
Kidney-RCC	SP103507	-0.355948
Kidney-RCC	SP103100	-0.449671
Kidney-RCC	SP43651	-0.741785
Kidney-RCC	SP103416	-0.271212
Kidney-RCC	SP37636	0.190547
Kidney-RCC	SP106656	-0.746287
Kidney-RCC	SP39907	0.0588585
Kidney-RCC	SP40736	-0.375938
Kidney-RCC	SP103005	-0.341626
Kidney-RCC	SP42154	-0.65956
Kidney-RCC	SP97249	-0.73343
Kidney-RCC	SP106638	-0.745708
Kidney-RCC	SP102759	-0.494786
Kidney-RCC	SP97161	-0.738756
Kidney-RCC	SP102741	-0.366995
Kidney-RCC	SP102945	-0.37716
Kidney-RCC	SP39594	-0.703162
Kidney-RCC	SP103826	-0.456626
Kidney-RCC	SP103706	-0.434436
Kidney-RCC	SP102897	-0.39407
Kidney-RCC	SP41453	-0.742496
Kidney-RCC	SP43696	-0.736796
Kidney-RCC	SP102881	-0.51089
Kidney-RCC	SP97113	-0.739039
Kidney-RCC	SP103715	-0.51666
Kidney-RCC	SP102929	-0.500832
Kidney-RCC	SP103619	-0.437632
Kidney-RCC	SP103844	-0.398876
Kidney-RCC	SP103128	-0.391442
Kidney-RCC	SP34452	-0.681133
Kidney-RCC	SP103300	-0.500016
Kidney-RCC	SP42829	-0.746535
Kidney-RCC	SP103057	-0.460927
Kidney-RCC	SP97124	-0.320806
Kidney-RCC	SP103340	-0.362916
Kidney-RCC	SP43808	-0.737356
Kidney-RCC	SP43822	-0.727541
Kidney-RCC	SP37970	-0.741804
Kidney-RCC	SP102913	-0.264831
Kidney-RCC	SP34186	-0.728449
Kidney-RCC	SP43514	-0.737184
Kidney-RCC	SP102783	-0.30869
Kidney-RCC	SP103080	-0.747835
Kidney-RCC	SP103436	-0.454575
Kidney-RCC	SP102804	-0.320189
Kidney-RCC	SP102957	-0.403122
Kidney-RCC	SP97258	-0.741311
Kidney-RCC	SP102873	-0.397605
Kidney-RCC	SP103213	-0.405313
Kidney-RCC	SP37903	-0.723187
Kidney-RCC	SP103467	-0.527682
Kidney-RCC	SP35849	-0.709861
Kidney-RCC	SP103261	-0.412109
Kidney-RCC	SP97194	-0.179036
Kidney-RCC	SP103156	-0.412283
Kidney-RCC	SP109470	-0.35194
Kidney-RCC	SP103288	-0.378802
Kidney-RCC	SP103444	-0.413456
Kidney-RCC	SP103685	-0.46956
Kidney-RCC	SP36586	-0.738866
Kidney-RCC	SP34431	-0.688365
Kidney-RCC	SP103140	-0.741923
Kidney-RCC	SP103673	-0.378227
Kidney-RCC	SP102839	-0.334134
Kidney-RCC	SP97278	-0.742421
Kidney-RCC	SP37432	0.0498303
Kidney-RCC	SP35989	-0.735665
Kidney-RCC	SP39102	-0.736301
Kidney-RCC	SP103245	-0.504194
Kidney-RCC	SP109544	-0.743321
Kidney-RCC	SP34493	-0.675667
Kidney-RCC	SP97104	-0.742998
Kidney-RCC	SP106577	-0.742536
Kidney-RCC	SP103037	-0.454233
Kidney-RCC	SP103408	-0.35589
Kidney-RCC	SP109457	-0.749763
Kidney-RCC	SP36036	-0.732881
Kidney-RCC	SP35951	-0.743295
Kidney-RCC	SP103021	-0.249977
Kidney-RCC	SP103679	-0.300833
Kidney-RCC	SP103065	-0.748204
Kidney-RCC	SP102965	-0.502578
Kidney-RCC	SP103221	-0.289636
Kidney-RCC	SP39248	-0.647154
Kidney-RCC	SP109478	-0.217702
Kidney-RCC	SP43688	-0.350475
Kidney-RCC	SP97243	-0.737198
Kidney-RCC	SP103547	-0.415037
Kidney-RCC	SP102973	-0.290454
Kidney-RCC	SP103515	-0.46375
Kidney-RCC	SP97269	-0.741804
Kidney-RCC	SP102747	-0.280095
Kidney-RCC	SP103730	-0.374146
Kidney-RCC	SP103535	-0.331236
Kidney-RCC	SP113926	0.0279104
Kidney-RCC	SP102718	-0.455588
Kidney-RCC	SP103483	-0.497897
Kidney-RCC	SP106560	-0.740972
Kidney-RCC	SP34246	-0.71455
Kidney-RCC	SP103428	-0.326736
Kidney-RCC	SP35412	-0.726093
Kidney-RCC	SP102755	-0.315081
Kidney-RCC	SP103694	-0.42618
Kidney-RCC	SP43792	-0.736781
Kidney-RCC	SP103595	-0.339473
Kidney-RCC	SP39298	-0.720243
Kidney-RCC	SP38044	-0.728849
Kidney-RCC	SP38271	-0.746642
Kidney-RCC	SP103396	-0.587547
Kidney-RCC	SP106602	-0.736944
Kidney-RCC	SP43201	-0.725084
Kidney-RCC	SP102716	-0.769879
Kidney-RCC	SP102733	-0.389686
Kidney-RCC	SP102989	-0.383311
Kidney-RCC	SP97145	-0.745055
Kidney-RCC	SP103603	-0.344142
Kidney-RCC	SP43664	-0.737315
Kidney-RCC	SP102921	-0.460689
Kidney-RCC	SP103742	-0.36072
Kidney-RCC	SP43532	-0.738075
Kidney-RCC	SP103555	-0.681673
Kidney-RCC	SP103523	-0.345203
Kidney-RCC	SP34191	-0.697036
Kidney-RCC	SP103575	-0.767625
Kidney-RCC	SP40047	-0.715412
Kidney-RCC	SP103045	-0.292333
Kidney-RCC	SP103455	-0.266301
Kidney-RCC	SP39349	-0.72545
Kidney-RCC	SP37369	-0.724117
Kidney-RCC	SP38759	-0.722219
Kidney-RCC	SP36218	-0.72571
Kidney-RCC	SP103856	-0.520966
Prost-AdenoCA	SP112829	-0.472179
Prost-AdenoCA	SP23435	-0.637753
Prost-AdenoCA	SP112947	-0.482346
Prost-AdenoCA	SP112925	-0.22484
Prost-AdenoCA	SP112937	-0.526116
Prost-AdenoCA	SP111145	-0.733734
Prost-AdenoCA	SP111143	-0.736757
Prost-AdenoCA	SP125584	-0.573896
Prost-AdenoCA	SP111144	-0.740536
Prost-AdenoCA	SP116296	-0.735411
Prost-AdenoCA	SP112815	-0.49361
Prost-AdenoCA	SP112799	-0.596795
Prost-AdenoCA	SP80037	-0.457587
Prost-AdenoCA	SP116254	-0.727199
Prost-AdenoCA	SP112835	-0.548149
Prost-AdenoCA	SP116256	-0.724875
Prost-AdenoCA	SP112955	-0.320549
Prost-AdenoCA	SP112807	-0.534258
Prost-AdenoCA	SP116274	-0.464397
Prost-AdenoCA	SP114910	-0.21637
Prost-AdenoCA	SP114906	-0.29854
Prost-AdenoCA	SP114921	-0.741504
Prost-AdenoCA	SP114901	-0.726174
Prost-AdenoCA	SP114926	-0.734058
Prost-AdenoCA	SP114974	-0.713671
Prost-AdenoCA	SP114958	-0.26637
Prost-AdenoCA	SP114935	-0.720393
Prost-AdenoCA	SP114900	-0.73079
Prost-AdenoCA	SP114941	-0.253047
Prost-AdenoCA	SP114937	-0.273267
Prost-AdenoCA	SP114945	-0.256703
Prost-AdenoCA	SP114943	-0.273669
Prost-AdenoCA	SP114949	-0.384525
Prost-AdenoCA	SP114960	-0.274909
Prost-AdenoCA	SP114962	-0.272504
Prost-AdenoCA	SP114996	-0.732476
Prost-AdenoCA	SP114987	-0.73913
Prost-AdenoCA	SP114966	-0.263484
Prost-AdenoCA	SP114903	-0.733103
Prost-AdenoCA	SP114914	-0.265578
Prost-AdenoCA	SP114944	-0.26326
Prost-AdenoCA	SP114930	-0.735537
Prost-AdenoCA	SP114946	-0.380244
Prost-AdenoCA	SP114951	-0.35262
Prost-AdenoCA	SP114953	-0.274067
Prost-AdenoCA	SP114924	-0.74082
Prost-AdenoCA	SP114957	-0.244916
Prost-AdenoCA	SP114986	-0.643842
Prost-AdenoCA	SP114971	-0.694381
Prost-AdenoCA	SP114991	-0.73121
Prost-AdenoCA	SP114992	-0.734733
Prost-AdenoCA	SP114920	-0.232616
Prost-AdenoCA	SP114898	-0.731154
Prost-AdenoCA	SP114932	-0.745938
Prost-AdenoCA	SP114934	-0.71236
Prost-AdenoCA	SP114968	-0.268715
Prost-AdenoCA	SP114982	-0.644051
Prost-AdenoCA	SP114973	-0.720904
Prost-AdenoCA	SP114908	-0.266183
Prost-AdenoCA	SP114904	-0.203887
Prost-AdenoCA	SP114918	-0.248565
Prost-AdenoCA	SP114984	-0.696478
Prost-AdenoCA	SP114994	-0.726917
Prost-AdenoCA	SP114978	-0.71692
Prost-AdenoCA	SP114912	-0.23698
Prost-AdenoCA	SP114917	-0.255413
Prost-AdenoCA	SP114980	-0.633181
Prost-AdenoCA	SP114976	-0.719863
Prost-AdenoCA	SP114916	-0.242748
Prost-AdenoCA	SP102690	-0.72614
Prost-AdenoCA	SP112953	-0.529794
Prost-AdenoCA	SP112911	-0.535927
Prost-AdenoCA	SP112847	-0.33118
Prost-AdenoCA	SP112859	-0.149465
Prost-AdenoCA	SP116259	-0.747177
Prost-AdenoCA	SP112919	-0.464647
Prost-AdenoCA	SP116290	-0.742008
Prost-AdenoCA	SP102652	-0.725605
Prost-AdenoCA	SP116258	-0.729382
Prost-AdenoCA	SP112981	-0.541609
Prost-AdenoCA	SP102620	-0.484314
Prost-AdenoCA	SP112987	-0.43619
Prost-AdenoCA	SP116261	-0.748334
Prost-AdenoCA	SP23463	-0.463216
Prost-AdenoCA	SP116268	-0.545053
Prost-AdenoCA	SP112825	-0.493104
Prost-AdenoCA	SP112967	-0.569156
Prost-AdenoCA	SP102622	-0.619856
Prost-AdenoCA	SP23471	-0.365805
Prost-AdenoCA	SP112785	-0.734413
Prost-AdenoCA	SP80213	-0.718975
Prost-AdenoCA	SP116266	-0.203174
Prost-AdenoCA	SP112793	0.0563491
Prost-AdenoCA	SP116264	-0.141811
Prost-AdenoCA	SP112963	-0.501487
Prost-AdenoCA	SP112801	-0.682136
Prost-AdenoCA	SP116269	-0.375362
Prost-AdenoCA	SP112997	-0.448013
Prost-AdenoCA	SP112973	-0.540953
Prost-AdenoCA	SP112819	-0.460999
Prost-AdenoCA	SP116275	-0.508325
Prost-AdenoCA	SP112941	-0.398173
Prost-AdenoCA	SP112965	-0.494093
Prost-AdenoCA	SP112791	-0.471665
Prost-AdenoCA	SP23447	-0.596024
Prost-AdenoCA	SP116255	-0.731093
Prost-AdenoCA	SP23455	-0.547923
Prost-AdenoCA	SP23475	-0.732289
Prost-AdenoCA	SP112949	-0.239969
Prost-AdenoCA	SP112857	-0.673917
Prost-AdenoCA	SP116227	-0.743826
Prost-AdenoCA	SP112843	-0.511353
Prost-AdenoCA	SP112915	-0.459506
Prost-AdenoCA	SP112837	-0.443445
Prost-AdenoCA	SP116226	-0.731732
Prost-AdenoCA	SP112823	-0.559192
Prost-AdenoCA	SP102633	-0.734454
Prost-AdenoCA	SP112899	-0.213399
Prost-AdenoCA	SP23443	-0.608445
Prost-AdenoCA	SP112893	-0.291624
Prost-AdenoCA	SP116260	-0.746098
Prost-AdenoCA	SP112895	-0.497833
Prost-AdenoCA	SP116280	-0.74449
Prost-AdenoCA	SP116224	-0.716359
Prost-AdenoCA	SP102626	-0.73723
Prost-AdenoCA	SP79939	-0.71759
Prost-AdenoCA	SP109649	-0.729121
Prost-AdenoCA	SP112795	-0.685391
Prost-AdenoCA	SP112927	-0.510191
Prost-AdenoCA	SP112779	-0.553166
Prost-AdenoCA	SP112975	-0.384996
Prost-AdenoCA	SP116249	-0.587818
Prost-AdenoCA	SP116232	-0.572037
Prost-AdenoCA	SP112867	-0.643377
Prost-AdenoCA	SP112903	-0.206088
Prost-AdenoCA	SP112933	-0.474466
Prost-AdenoCA	SP112869	-0.279054
Prost-AdenoCA	SP116251	-0.570806
Prost-AdenoCA	SP116272	-0.514309
Prost-AdenoCA	SP116286	-0.744151
Prost-AdenoCA	SP112999	-0.541441
Prost-AdenoCA	SP112939	-0.461268
Prost-AdenoCA	SP116282	-0.742961
Prost-AdenoCA	SP116288	-0.731101
Prost-AdenoCA	SP112921	-0.357332
Prost-AdenoCA	SP112901	-0.539953
Prost-AdenoCA	SP23467	-0.545845
Prost-AdenoCA	SP116263	-0.745897
Prost-AdenoCA	SP112831	-0.484778
Prost-AdenoCA	SP79988	-0.333554
Prost-AdenoCA	SP112891	-0.452459
Prost-AdenoCA	SP116292	-0.740575
Prost-AdenoCA	SP116248	-0.725023
Prost-AdenoCA	SP80183	-0.723218
Prost-AdenoCA	SP112775	-0.69628
Prost-AdenoCA	SP112897	-0.469149
Prost-AdenoCA	SP116276	-0.745215
Prost-AdenoCA	SP112885	-0.568023
Prost-AdenoCA	SP112789	-0.344247
Prost-AdenoCA	SP116265	-0.284701
Prost-AdenoCA	SP102630	0.0799222
Prost-AdenoCA	SP116267	-0.462183
Prost-AdenoCA	SP112971	-0.520568
Prost-AdenoCA	SP112821	-0.533222
Prost-AdenoCA	SP112813	-0.672853
Prost-AdenoCA	SP112961	-0.454845
Prost-AdenoCA	SP116253	-0.51848
Prost-AdenoCA	SP112977	-0.50944
Prost-AdenoCA	SP112905	-0.52095
Prost-AdenoCA	SP102647	-0.735061
Prost-AdenoCA	SP79971	-0.722577
Prost-AdenoCA	SP112873	-0.27349
Prost-AdenoCA	SP23481	-0.734485
Prost-AdenoCA	SP112959	-0.559632
Prost-AdenoCA	SP112931	-0.45526
Prost-AdenoCA	SP112865	-0.688063
Prost-AdenoCA	SP113003	-0.48063
Prost-AdenoCA	SP113001	-0.442556
Prost-AdenoCA	SP112879	-0.509786
Prost-AdenoCA	SP116233	-0.732201
Prost-AdenoCA	SP80217	-0.714122
Prost-AdenoCA	SP116284	-0.740217
Prost-AdenoCA	SP112945	-0.491634
Prost-AdenoCA	SP112935	-0.439442
Prost-AdenoCA	SP116270	-0.468253
Prost-AdenoCA	SP116257	-0.732683
Prost-AdenoCA	SP79968	-0.718799
Prost-AdenoCA	SP112863	-0.216285
Prost-AdenoCA	SP80160	-0.718204
Prost-AdenoCA	SP112983	-0.212522
Prost-AdenoCA	SP112809	-0.74075
Prost-AdenoCA	SP116298	-0.73274
Prost-AdenoCA	SP112923	-0.417907
Prost-AdenoCA	SP112853	-0.570657
Prost-AdenoCA	SP116294	-0.740626
Prost-AdenoCA	SP113005	-0.552703
Prost-AdenoCA	SP80244	-0.71881
Prost-AdenoCA	SP112957	-0.259645
Prost-AdenoCA	SP112783	-0.477243
Prost-AdenoCA	SP23439	0.585566
Prost-AdenoCA	SP23483	-0.71776
Prost-AdenoCA	SP116262	-0.750685
Prost-AdenoCA	SP112943	-0.486325
Prost-AdenoCA	SP112861	-0.703094
Prost-AdenoCA	SP112917	-0.317186
Prost-AdenoCA	SP116228	-0.737518
Prost-AdenoCA	SP112787	-0.679475
Prost-AdenoCA	SP116222	-0.735982
Prost-AdenoCA	SP79998	-0.722816
Prost-AdenoCA	SP112995	-0.506001
Prost-AdenoCA	SP112811	-0.697296
Prost-AdenoCA	SP23451	-0.463957
Prost-AdenoCA	SP112797	-0.645153
Prost-AdenoCA	SP112909	-0.296594
Prost-AdenoCA	SP112781	-0.727072
Prost-AdenoCA	SP116247	-0.723989
Prost-AdenoCA	SP112991	-0.442438
Prost-AdenoCA	SP112907	-0.492284
Prost-AdenoCA	SP112817	-0.619794
Prost-AdenoCA	SP116225	-0.736065
Prost-AdenoCA	SP112993	-0.417817
Prost-AdenoCA	SP112827	-0.660678
Prost-AdenoCA	SP112855	-0.566675
Prost-AdenoCA	SP80216	-0.71075
Prost-AdenoCA	SP112969	-0.524641
Prost-AdenoCA	SP116221	-0.741071
Prost-AdenoCA	SP116271	-0.492657
Prost-AdenoCA	SP112883	-0.552455
Prost-AdenoCA	SP112929	-0.330171
Prost-AdenoCA	SP112833	-0.309626
Prost-AdenoCA	SP80042	-0.716037
Prost-AdenoCA	SP23459	-0.693493
Prost-AdenoCA	SP79907	-0.724979
Prost-AdenoCA	SP23479	-0.736759
Prost-AdenoCA	SP79958	-0.719885
Prost-AdenoCA	SP80205	-0.743757
Prost-AdenoCA	SP112777	-0.51756
Prost-AdenoCA	SP116223	-0.732287
Prost-AdenoCA	SP116229	-0.698264
Prost-AdenoCA	SP112887	-0.509796
Prost-AdenoCA	SP23477	-0.736488
Prost-AdenoCA	SP112877	-0.405969
Prost-AdenoCA	SP112871	-0.484087
Prost-AdenoCA	SP116252	-0.479517
Prost-AdenoCA	SP116278	-0.74355
Prost-AdenoCA	SP112875	0.580846
Prost-AdenoCA	SP80014	-0.720489
Prost-AdenoCA	SP23431	-0.661299
Prost-AdenoCA	SP112913	-0.204756
Prost-AdenoCA	SP112849	-0.705236
Prost-AdenoCA	SP112881	-0.533569
Prost-AdenoCA	SP116231	-0.739968
Prost-AdenoCA	SP125579	-0.593773
Prost-AdenoCA	SP111131	-0.728161
Prost-AdenoCA	SP111126	-0.71771
Prost-AdenoCA	SP111146	-0.733943
Prost-AdenoCA	SP111123	-0.729837
Prost-AdenoCA	SP111127	-0.729657
Prost-AdenoCA	SP111121	-0.719519
Prost-AdenoCA	SP111156	-0.741445
Prost-AdenoCA	SP111122	-0.730154
Prost-AdenoCA	SP111129	-0.725204
Prost-AdenoCA	SP111152	-0.737542
Prost-AdenoCA	SP111154	-0.741533
Prost-AdenoCA	SP111124	-0.733884
Prost-AdenoCA	SP111128	-0.732395
Prost-AdenoCA	SP111125	-0.430273
Prost-AdenoCA	SP111130	-0.589997
Prost-AdenoCA	SP106835	-0.410331
Prost-AdenoCA	SP106834	-0.401161
Prost-AdenoCA	SP106825	-0.6408
Prost-AdenoCA	SP106841	0.0714336
Prost-AdenoCA	SP106827	-0.594581
Prost-AdenoCA	SP106833	-0.497434
Prost-AdenoCA	SP106839	-0.725191
Prost-AdenoCA	SP106840	-0.710728
Prost-AdenoCA	SP106828	-0.637716
Prost-AdenoCA	SP106829	-0.49906
Prost-AdenoCA	SP106836	-0.476113
Prost-AdenoCA	SP106837	-0.470848
Prost-AdenoCA	SP116250	-0.5816
Prost-AdenoCA	SP112951	-0.452491
Prost-AdenoCA	SP112845	-0.506441
Lung-AdenoCA	SP50827	-0.733017
Lung-AdenoCA	SP50263	-0.626445
Lung-AdenoCA	SP50317	-0.722388
Lung-AdenoCA	SP54113	0.721977
Lung-AdenoCA	SP50406	-0.511376
Lung-AdenoCA	SP51824	0.263372
Lung-AdenoCA	SP55387	-0.709286
Lung-AdenoCA	SP52779	-0.588286
Lung-AdenoCA	SP55235	0.68365
Lung-AdenoCA	SP50713	0.671629
Lung-AdenoCA	SP50611	0.65853
Lung-AdenoCA	SP50485	-0.684289
Lung-AdenoCA	SP51037	0.288829
Lung-AdenoCA	SP55142	-0.56936
Lung-AdenoCA	SP53387	-0.595282
Lung-AdenoCA	SP54745	-0.725921
Lung-AdenoCA	SP52284	-0.23281
Lung-AdenoCA	SP53618	0.233185
Lung-AdenoCA	SP52232	0.672014
Lung-AdenoCA	SP50412	-0.743945
Lung-AdenoCA	SP50321	-0.477033
Lung-AdenoCA	SP53548	-0.724446
Lung-AdenoCA	SP55004	-0.7434
Lung-AdenoCA	SP56079	0.743086
Lung-AdenoCA	SP56168	-0.736389
Lung-AdenoCA	SP54363	-0.246564
Lung-AdenoCA	SP53810	-0.655175
Lung-AdenoCA	SP50518	-0.614406
Lung-AdenoCA	SP56303	-0.150547
Lung-AdenoCA	SP55711	-0.734239
Lung-AdenoCA	SP55509	-0.735339
Lung-AdenoCA	SP55309	0.660097
Lung-AdenoCA	SP52607	0.733174
Lung-AdenoCA	SP52667	0.745946
Lung-AdenoCA	SP51446	-0.636211
Lung-AdenoCA	SP50592	-0.737505
Lung-AdenoCA	SP53073	-0.660345
Biliary-AdenoCA	SP117655	-0.60468
Biliary-AdenoCA	SP99287	-0.342065
Biliary-AdenoCA	SP99293	-0.338607
Biliary-AdenoCA	SP99297	-0.444743
Biliary-AdenoCA	SP117556	-0.717697
Biliary-AdenoCA	SP117627	-0.705682
Biliary-AdenoCA	SP117775	-0.2818
Biliary-AdenoCA	SP117332	-0.734776
Biliary-AdenoCA	SP99301	-0.453756
Biliary-AdenoCA	SP99305	-0.220711
Biliary-AdenoCA	SP99309	-0.34992
Biliary-AdenoCA	SP99313	-0.326989
Biliary-AdenoCA	SP99317	-0.717756
Biliary-AdenoCA	SP99321	-0.352622
Biliary-AdenoCA	SP99325	-0.397168
Biliary-AdenoCA	SP99329	-0.421729
Biliary-AdenoCA	SP99333	-0.742517
Biliary-AdenoCA	SP117712	-0.526926
Biliary-AdenoCA	SP99337	-0.320501
Biliary-AdenoCA	SP99341	-0.443379
Biliary-AdenoCA	SP99345	-0.732361
Biliary-AdenoCA	SP99113	-0.748319
Biliary-AdenoCA	SP117017	-0.494559
Biliary-AdenoCA	SP117031	-0.707269
Biliary-AdenoCA	SP117759	-0.725469
Biliary-AdenoCA	SP99185	-0.741457
Biliary-AdenoCA	SP99209	-0.743811
Biliary-AdenoCA	SP99221	-0.737383
Biliary-AdenoCA	SP99225	-0.744335
Biliary-AdenoCA	SP117621	-0.537359
Biliary-AdenoCA	SP117425	-0.721674
Biliary-AdenoCA	SP117930	-0.724711
Biliary-AdenoCA	SP99241	-0.732973
Lung-SCC	SP56638	-0.71258
Lung-SCC	SP56537	-0.298283
Lung-SCC	SP57586	-0.641358
Lung-SCC	SP56541	0.666496
Lung-SCC	SP56553	0.175751
Lung-SCC	SP56771	-0.68043
Lung-SCC	SP57941	-0.715564
Lung-SCC	SP57818	-0.637704
Lung-SCC	SP56460	-0.641019
Lung-SCC	SP56474	-0.636796
Lung-SCC	SP56704	0.558543
Lung-SCC	SP56533	-0.6498
Lung-SCC	SP56730	-0.5947
Lung-SCC	SP59245	-0.690385
Lung-SCC	SP57024	-0.630169
Lung-SCC	SP57933	-0.682731
Lung-SCC	SP56754	-0.620534
Lung-SCC	SP56827	-0.541136
Lung-SCC	SP57084	-0.630388
Lung-SCC	SP57538	-0.69293
Lung-SCC	SP57735	-0.561728
Lung-SCC	SP57669	-0.684636
Lung-SCC	SP56566	-0.662457
Lung-SCC	SP56569	-0.288492
Lung-SCC	SP58342	-0.574896
Lung-SCC	SP58349	-0.507904
Lung-SCC	SP56644	-0.397028
Lung-SCC	SP57629	-0.66233
Lung-SCC	SP56941	-0.275113
Lung-SCC	SP57619	0.687814
Lung-SCC	SP58245	-0.674738
Lung-SCC	SP57251	-0.664577
Lung-SCC	SP56502	0.28519
Lung-SCC	SP58668	0.307157
Lung-SCC	SP58101	-0.687488
Lung-SCC	SP58991	-0.593395
Lung-SCC	SP56607	-0.709062
Lung-SCC	SP58326	-0.665441
Lung-SCC	SP57267	-0.60611
Lung-SCC	SP57066	-0.477099
Lung-SCC	SP57901	-0.667136
Lung-SCC	SP57651	-0.723132
Lung-SCC	SP57450	-0.638974
Lung-SCC	SP57846	-0.676067
Lung-SCC	SP58612	0.0997093
Lung-SCC	SP56821	-0.429324
Lung-SCC	SP58882	-0.661738
Lung-SCC	SP57189	-0.618721
Eso-AdenoCA	SP111062	-0.401618
Eso-AdenoCA	SP111006	-0.398853
Eso-AdenoCA	SP110846	-0.71982
Eso-AdenoCA	SP111086	-0.716183
Eso-AdenoCA	SP111096	-0.700488
Eso-AdenoCA	SP111021	-0.597127
Eso-AdenoCA	SP111058	-0.722272
Eso-AdenoCA	SP111092	-0.297003
Eso-AdenoCA	SP111076	-0.692729
Eso-AdenoCA	SP111039	-0.599184
Eso-AdenoCA	SP111052	-0.717304
Eso-AdenoCA	SP111166	-0.273685
Eso-AdenoCA	SP111014	-0.743408
Eso-AdenoCA	SP111066	-0.709274
Eso-AdenoCA	SP111094	-0.701001
Eso-AdenoCA	SP110853	-0.372826
Eso-AdenoCA	SP111051	-0.326712
Eso-AdenoCA	SP110855	-0.312928
Eso-AdenoCA	SP111004	-0.719033
Eso-AdenoCA	SP110863	-0.486764
Eso-AdenoCA	SP111013	-0.737256
Eso-AdenoCA	SP111042	-0.563762
Eso-AdenoCA	SP111040	-0.355614
Eso-AdenoCA	SP111031	-0.736772
Eso-AdenoCA	SP23496	-0.371592
Eso-AdenoCA	SP111030	-0.492145
Eso-AdenoCA	SP111019	-0.536649
Eso-AdenoCA	SP111026	-0.73862
Eso-AdenoCA	SP110860	-0.292431
Eso-AdenoCA	SP110851	-0.401878
Eso-AdenoCA	SP111059	-0.355305
Eso-AdenoCA	SP111170	-0.340056
Eso-AdenoCA	SP111054	-0.714511
Eso-AdenoCA	SP111033	-0.684091
Eso-AdenoCA	SP110865	-0.339873
Eso-AdenoCA	SP111061	-0.39007
Eso-AdenoCA	SP111101	-0.740142
Eso-AdenoCA	SP110859	-0.374996
Eso-AdenoCA	SP111168	-0.392795
Eso-AdenoCA	SP111067	-0.271814
Eso-AdenoCA	SP111036	-0.393844
Eso-AdenoCA	SP111116	-0.700526
Eso-AdenoCA	SP111099	-0.730205
Eso-AdenoCA	SP23502	0.284163
Eso-AdenoCA	SP111069	-0.733999
Eso-AdenoCA	SP111043	-0.708522
Eso-AdenoCA	SP111024	-0.308086
Eso-AdenoCA	SP111011	-0.721024
Eso-AdenoCA	SP111082	-0.36081
Eso-AdenoCA	SP111074	-0.706047
Eso-AdenoCA	SP110845	-0.693823
Eso-AdenoCA	SP110857	-0.439988
Eso-AdenoCA	SP111017	-0.708049
Eso-AdenoCA	SP111080	-0.584326
Eso-AdenoCA	SP23506	-0.504139
Eso-AdenoCA	SP111075	-0.379369
Eso-AdenoCA	SP111001	-0.253815
Eso-AdenoCA	SP111027	-0.71812
Eso-AdenoCA	SP111117	-0.68319
Eso-AdenoCA	SP110842	-0.697282
Eso-AdenoCA	SP111173	-0.474603
Eso-AdenoCA	SP111008	-0.684485
Eso-AdenoCA	SP111070	-0.726169
Eso-AdenoCA	SP110847	-0.734392
Eso-AdenoCA	SP111077	-0.740495
Eso-AdenoCA	SP111091	-0.72738
Eso-AdenoCA	SP111072	-0.310441
Eso-AdenoCA	SP111084	-0.676734
Eso-AdenoCA	SP23504	-0.395669
Eso-AdenoCA	SP23500	-0.47428
Eso-AdenoCA	SP111029	-0.551717
Eso-AdenoCA	SP111175	-0.7167
Eso-AdenoCA	SP111049	-0.698837
Eso-AdenoCA	SP23498	-0.394973
Eso-AdenoCA	SP111002	-0.736819
Eso-AdenoCA	SP110866	-0.411471
Eso-AdenoCA	SP111114	-0.681593
Eso-AdenoCA	SP111000	-0.557282
Eso-AdenoCA	SP111045	-0.730971
Eso-AdenoCA	SP110861	-0.723041
Eso-AdenoCA	SP111088	-0.701958
Eso-AdenoCA	SP111056	-0.387368
Eso-AdenoCA	SP111038	-0.68796
Eso-AdenoCA	SP111164	-0.692571
Eso-AdenoCA	SP111057	-0.701825
Eso-AdenoCA	SP111119	-0.30578
Eso-AdenoCA	SP111095	-0.73971
Eso-AdenoCA	SP111064	-0.335347
Lung-SCLC	S00022	-0.631768
Lung-SCLC	S00035	-0.610097
Lung-SCLC	S00050	-0.71497
Lung-SCLC	S00339	-0.56888
Lung-SCLC	S00356	-0.526025
Lung-SCLC	S00472	-0.585126
Lung-SCLC	S00501	-0.658515
Lung-SCLC	S00539	-0.604736
Lung-SCLC	S00825	-0.331468
Lung-SCLC	S00827	0.336175
Lung-SCLC	S00829	-0.654133
Lung-SCLC	S00830	-0.541627
Lung-SCLC	S00831	-0.733338
Lung-SCLC	S00832	0.063443
Lung-SCLC	S00833	0.498077
Lung-SCLC	S00837	0.470771
Lung-SCLC	S00838	0.528888
Lung-SCLC	S00842	-0.683262
Lung-SCLC	S00932	-0.634799
Lung-SCLC	S00933	-0.54224
Lung-SCLC	S00934	-0.672829
Lung-SCLC	S00938	-0.528987
Lung-SCLC	S00941	0.337097
Lung-SCLC	S00944	-0.705572
Lung-SCLC	S00945	-0.666795
Lung-SCLC	S00947	-0.663758
Lung-SCLC	S01020	0.523217
Lung-SCLC	S01022	0.680621
Lung-SCLC	S01023	-0.584327
Lung-SCLC	S01170	-0.680294
Lung-SCLC	S01297	-0.626277
Lung-SCLC	S01366	-0.460916
Lung-SCLC	S01453	-0.707959
Lung-SCLC	S01494	-0.60264
Lung-SCLC	S01512	-0.643626
Lung-SCLC	S01516	-0.709794
Lung-SCLC	S01524	-0.289403
Lung-SCLC	S01542	-0.578719
Lung-SCLC	S01563	-0.690762
Lung-SCLC	S01578	-0.715491
Lung-SCLC	S01728	-0.664704
Lung-SCLC	S01861	-0.707871
Lung-SCLC	S01864	-0.555583
Lung-SCLC	S01873	-0.684384
Lung-SCLC	S02065	-0.682053
Lung-SCLC	S02093	-0.692568
Lung-SCLC	S02120	-0.437221
Lung-SCLC	S02139	-0.743859
Lung-SCLC	S02194	-0.645692
Lung-SCLC	S02209	-0.661259
Lung-SCLC	S02219	-0.548356
Lung-SCLC	S02234	-0.695316
Lung-SCLC	S02237	-0.724077
Lung-SCLC	S02241	-0.722089
Lung-SCLC	S02242	-0.73042
Lung-SCLC	S02243	-0.665034
Lung-SCLC	S02244	-0.638491
Lung-SCLC	S02245	-0.676948
Lung-SCLC	S02246	-0.69241
Lung-SCLC	S02248	-0.684024
Lung-SCLC	S02249	-0.64742
Lung-SCLC	S02255	-0.661865
Lung-SCLC	S02256	-0.698882
Lung-SCLC	S02273	-0.692624
Lung-SCLC	S02274	-0.683025
Lung-SCLC	S02275	-0.616316
Lung-SCLC	S02277	-0.674143
Lung-SCLC	S02279	-0.683264
Lung-SCLC	S02284	-0.638789
Lung-SCLC	S02285	-0.0318534
Lung-SCLC	S02286	-0.40729
Lung-SCLC	S02287	-0.55597
Lung-SCLC	S02289	-0.361634
Lung-SCLC	S02290	0.0100144
Lung-SCLC	S02291	-0.595121
Lung-SCLC	S02292	-0.400531
Lung-SCLC	S02293	-0.573127
Lung-SCLC	S02294	-0.651811
Lung-SCLC	S02295	-0.33927
Lung-SCLC	S02296	-0.451931
Lung-SCLC	S02297	-0.691236
Lung-SCLC	S02299	-0.54335
Lung-SCLC	S02322	-0.661149
Lung-SCLC	S02328	-0.671793
Lung-SCLC	S02342	-0.726041
Lung-SCLC	S02344	-0.71136
Lung-SCLC	S02347	-0.712081
Lung-SCLC	S02348	-0.685474
Lung-SCLC	S02350	-0.649978
Lung-SCLC	S02351	-0.623987
Lung-SCLC	S02352	-0.666822
Lung-SCLC	S02353	-0.730882
Lung-SCLC	S02354	-0.653995
Lung-SCLC	S02355	-0.670448
Lung-SCLC	S02360	-0.638638
Lung-SCLC	S02375	-0.575366
Lung-SCLC	S02376	-0.674533
Lung-SCLC	S02378	-0.717028
Lung-SCLC	S02382	-0.587886
Lung-SCLC	S02384	-0.644711
Lung-SCLC	S02385	-0.626619
Stomach-AdenoCA	SP85122	-0.155008
Stomach-AdenoCA	SP135192	-0.68394
Stomach-AdenoCA	SP135335	-0.650009
Stomach-AdenoCA	SP135278	-0.739492
Stomach-AdenoCA	SP135287	-0.745198
Stomach-AdenoCA	SP135345	-0.541988
Stomach-AdenoCA	SP84384	-0.354938
Stomach-AdenoCA	SP135184	-0.552368
Stomach-AdenoCA	SP85251	-0.556457
Stomach-AdenoCA	SP135226	-0.745971
Stomach-AdenoCA	SP84408	-0.568262
Stomach-AdenoCA	SP84491	-0.690398
Stomach-AdenoCA	SP84743	-0.119569
Stomach-AdenoCA	SP83967	-0.698963
Stomach-AdenoCA	SP135436	-0.625693
Stomach-AdenoCA	SP135262	-0.731025
Stomach-AdenoCA	SP135431	0.0610768
Stomach-AdenoCA	SP105253	-0.700089
Stomach-AdenoCA	SP135425	-0.497228
Stomach-AdenoCA	SP84998	-0.695478
Stomach-AdenoCA	SP84062	-0.579162
Stomach-AdenoCA	SP135222	-0.710909
Stomach-AdenoCA	SP135230	-0.714565
Stomach-AdenoCA	SP135205	-0.548148
Stomach-AdenoCA	SP84982	-0.548514
Stomach-AdenoCA	SP84790	-0.675771
Stomach-AdenoCA	SP105673	-0.665341
Stomach-AdenoCA	SP135180	-0.380819
Stomach-AdenoCA	SP135213	-0.747758
Stomach-AdenoCA	SP135217	-0.745865
Stomach-AdenoCA	SP85339	-0.699499
Stomach-AdenoCA	SP84719	-0.247376
Stomach-AdenoCA	SP135405	-0.650308
Stomach-AdenoCA	SP105425	-0.666216
Stomach-AdenoCA	SP84056	-0.647305
Stomach-AdenoCA	SP135238	-0.738419
Stomach-AdenoCA	SP135270	-0.691494
Stomach-AdenoCA	SP135411	-0.162898
Stomach-AdenoCA	SP105261	-0.66539
Stomach-AdenoCA	SP85379	-0.55398
Stomach-AdenoCA	SP135188	-0.332619
Stomach-AdenoCA	SP105086	-0.601604
Stomach-AdenoCA	SP135194	-0.425446
Stomach-AdenoCA	SP135186	-0.409097
Stomach-AdenoCA	SP84392	-0.511021
Stomach-AdenoCA	SP135420	-0.474367
Stomach-AdenoCA	SP135258	-0.559196
Stomach-AdenoCA	SP135234	-0.734961
Stomach-AdenoCA	SP105018	-0.643871
Stomach-AdenoCA	SP84858	-0.634322
Stomach-AdenoCA	SP84086	-0.721511
Stomach-AdenoCA	SP105213	-0.608586
Stomach-AdenoCA	SP135293	-0.732267
Stomach-AdenoCA	SP105577	-0.644773
Stomach-AdenoCA	SP135393	-0.674047
Stomach-AdenoCA	SP135299	-0.691328
Stomach-AdenoCA	SP135415	-0.562533
Stomach-AdenoCA	SP85431	-0.715355
Stomach-AdenoCA	SP135310	-0.667681
Stomach-AdenoCA	SP84962	-0.656992
Stomach-AdenoCA	SP105006	-0.597919
Stomach-AdenoCA	SP84439	-0.565218
Stomach-AdenoCA	SP105159	-0.686779
Stomach-AdenoCA	SP135323	-0.718158
Stomach-AdenoCA	SP85230	-0.584958
Stomach-AdenoCA	SP135390	-0.540613
Stomach-AdenoCA	SP84922	-0.708682
Stomach-AdenoCA	SP85130	-0.691927
Stomach-AdenoCA	SP104984	-0.715438
Stomach-AdenoCA	SP135209	-0.733955
Stomach-AdenoCA	SP85222	-0.646736
Stomach-AdenoCA	SP135240	-0.320848
Stomach-AdenoCA	SP105375	-0.709927
Stomach-AdenoCA	SP135182	-0.665936
Stomach-AdenoCA	SP85287	-0.668625
Bladder-TCC	SP1086	-0.637061
Bladder-TCC	SP1003	-0.694416
Bladder-TCC	SP1677	-0.697744
Bladder-TCC	SP1305	-0.581167
Bladder-TCC	SP963	-0.655905
Bladder-TCC	SP1144	-0.658338
Bladder-TCC	SP1132	-0.617389
Bladder-TCC	SP1712	-0.685046
Bladder-TCC	SP1114	-0.622548
Bladder-TCC	SP1431	-0.729501
Bladder-TCC	SP975	-0.676511
Bladder-TCC	SP1059	-0.646842
Bladder-TCC	SP1419	-0.583908
Bladder-TCC	SP1009	-0.599344
Bladder-TCC	SP1724	-0.691743
Bladder-TCC	SP96136	-0.668303
Bladder-TCC	SP967	-0.706863
Bladder-TCC	SP1781	-0.577622
Bladder-TCC	SP1174	-0.662607
Bladder-TCC	SP953	-0.525215
Bladder-TCC	SP1377	-0.678946
Bladder-TCC	SP1365	0.610942
Bladder-TCC	SP1491	-0.647456
ColoRect-AdenoCA	SP18310	-0.707426
ColoRect-AdenoCA	SP17172	-0.628613
ColoRect-AdenoCA	SP96133	-0.720292
ColoRect-AdenoCA	SP110242	-0.700667
ColoRect-AdenoCA	SP81312	-0.397538
ColoRect-AdenoCA	SP114330	-0.714874
ColoRect-AdenoCA	SP21017	-0.669687
ColoRect-AdenoCA	SP22383	-0.64868
ColoRect-AdenoCA	SP22031	-0.718446
ColoRect-AdenoCA	SP80367	-0.358327
ColoRect-AdenoCA	SP96112	-0.711685
ColoRect-AdenoCA	SP96120	-0.709846
ColoRect-AdenoCA	SP16886	-0.5999
ColoRect-AdenoCA	SP96124	-0.705312
ColoRect-AdenoCA	SP82087	-0.112785
ColoRect-AdenoCA	SP80615	-0.60512
ColoRect-AdenoCA	SP19295	-0.694154
ColoRect-AdenoCA	SP19670	-0.521309
ColoRect-AdenoCA	SP17905	-0.713337
ColoRect-AdenoCA	SP16934	-0.692438
ColoRect-AdenoCA	SP20993	-0.625668
ColoRect-AdenoCA	SP19983	-0.676132
ColoRect-AdenoCA	SP80271	-0.681081
ColoRect-AdenoCA	SP18121	-0.719741
ColoRect-AdenoCA	SP96122	-0.726613
ColoRect-AdenoCA	SP119755	-0.712952
ColoRect-AdenoCA	SP96126	-0.712266
ColoRect-AdenoCA	SP81172	-0.577923
ColoRect-AdenoCA	SP19606	-0.572776
ColoRect-AdenoCA	SP96118	-0.720511
ColoRect-AdenoCA	SP21528	-0.670886
ColoRect-AdenoCA	SP21400	-0.449287
ColoRect-AdenoCA	SP23078	-0.665496
ColoRect-AdenoCA	SP81840	-0.633608
ColoRect-AdenoCA	SP80657	-0.256443
ColoRect-AdenoCA	SP81494	-0.068795
ColoRect-AdenoCA	SP17430	-0.653375
ColoRect-AdenoCA	SP96110	-0.652354
ColoRect-AdenoCA	SP81711	-0.34312
ColoRect-AdenoCA	SP18946	-0.639775
ColoRect-AdenoCA	SP21057	-0.65433
ColoRect-AdenoCA	SP22750	0.0042193
ColoRect-AdenoCA	SP19750	-0.663742
ColoRect-AdenoCA	SP80423	-0.619718
ColoRect-AdenoCA	SP17016	-0.695083
ColoRect-AdenoCA	SP16958	-0.537837
ColoRect-AdenoCA	SP17329	-0.720835
ColoRect-AdenoCA	SP80754	-0.577316
ColoRect-AdenoCA	SP81440	-0.672852
ColoRect-AdenoCA	SP96116	-0.678873
ColoRect-AdenoCA	SP96129	-0.700582
ColoRect-AdenoCA	SP21193	-0.303161
ColoRect-AdenoCA	SP80950	-0.682018
ColoRect-AdenoCA	SP18787	-0.696037
ColoRect-AdenoCA	SP96114	-0.655063
ColoRect-AdenoCA	SP82103	-0.673902
ColoRect-AdenoCA	SP19582	-0.268619
ColoRect-AdenoCA	SP81137	-0.619667
ColoRect-AdenoCA	SP17294	-0.667649
Lymph-BNHL	SP59388	-0.235872
Lymph-BNHL	SP116649	-0.733843
Lymph-BNHL	SP59416	-0.719837
Lymph-BNHL	SP124977	-0.632036
Lymph-BNHL	SP59356	-0.735724
Lymph-BNHL	SP116612	-0.693811
Lymph-BNHL	SP116659	-0.585708
Lymph-BNHL	SP116668	-0.583845
Lymph-BNHL	SP116630	-0.584688
Lymph-BNHL	SP59412	-0.53108
Lymph-BNHL	SP116686	-0.697722
Lymph-BNHL	SP116694	-0.711958
Lymph-BNHL	SP116712	-0.573011
Lymph-BNHL	SP116726	-0.627376
Lymph-BNHL	SP127630	-0.225041
Lymph-BNHL	SP116723	-0.742777
Lymph-BNHL	SP59276	-0.59226
Lymph-BNHL	SP116703	-0.736329
Lymph-BNHL	SP59312	-0.644964
Lymph-BNHL	SP116701	-0.652164
Lymph-BNHL	SP59296	-0.464165
Lymph-BNHL	SP59280	-0.445146
Lymph-BNHL	SP59344	-0.226612
Lymph-BNHL	SP59460	-0.644332
Lymph-BNHL	SP59404	-0.407041
Lymph-BNHL	SP116709	-0.683016
Lymph-BNHL	SP59448	-0.681344
Lymph-BNHL	SP116614	-0.680456
Lymph-BNHL	SP59464	-0.746426
Lymph-BNHL	SP59364	-0.698837
Lymph-BNHL	SP116663	-0.502975
Lymph-BNHL	SP59444	-0.67353
Lymph-BNHL	SP116690	-0.696422
Lymph-BNHL	SP59270	-0.496341
Lymph-BNHL	SP59352	-0.713735
Lymph-BNHL	SP116652	-0.437548
Lymph-BNHL	SP116715	-0.597641
Lymph-BNHL	SP116718	-0.734468
Lymph-BNHL	SP116720	-0.727522
Lymph-BNHL	SP59284	-0.384841
Lymph-BNHL	SP116618	-0.708126
Lymph-BNHL	SP59436	-0.728896
Lymph-BNHL	SP116645	-0.686901
Lymph-BNHL	SP59320	-0.735756
Lymph-BNHL	SP116672	-0.77093
Lymph-BNHL	SP116635	-0.610992
Lymph-BNHL	SP59328	-0.444173
Lymph-BNHL	SP116627	-0.686012
Lymph-BNHL	SP116725	-0.463696
Lymph-BNHL	SP59292	-0.736964
Lymph-BNHL	SP116683	-0.725116
Lymph-BNHL	SP59372	-0.707056
Lymph-BNHL	SP116610	-0.533982
Lymph-BNHL	SP116638	-0.731444
Lymph-BNHL	SP59336	0.589448
Lymph-BNHL	SP124971	-0.666449
Lymph-BNHL	SP127634	0.0613306
Lymph-BNHL	SP116665	-0.713028
Lymph-BNHL	SP116674	-0.730399
Lymph-BNHL	SP116657	-0.565011
Lymph-BNHL	SP116670	-0.698938
Lymph-BNHL	SP116642	-0.734122
Lymph-BNHL	SP116606	-0.732353
Lymph-BNHL	SP116604	-0.727147
Lymph-BNHL	SP127636	0.306835
Lymph-BNHL	SP59376	-0.350489
Lymph-BNHL	SP59272	-0.362046
Lymph-BNHL	SP127628	-0.0278373
Lymph-BNHL	SP124969	-0.558288
Lymph-BNHL	SP116608	-0.737663
Lymph-BNHL	SP59396	-0.46634
Lymph-BNHL	SP116688	-0.356795
Lymph-BNHL	SP59392	-0.521418
Lymph-BNHL	SP59456	-0.639135
Lymph-BNHL	SP59348	-0.687989
Lymph-BNHL	SP59300	-0.71859
Lymph-BNHL	SP127640	-0.560362
Lymph-BNHL	SP59340	-0.730004
Lymph-BNHL	SP59380	-0.745569
Lymph-BNHL	SP59440	-0.660942
Lymph-BNHL	SP59428	-0.686606
Lymph-BNHL	SP59400	-0.674573
Lymph-BNHL	SP116624	-0.725072
Lymph-BNHL	SP59432	-0.749001
Lymph-BNHL	SP59452	-0.551414
Lymph-BNHL	SP116679	-0.735237
Lymph-BNHL	SP116676	-0.670253
Lymph-BNHL	SP59360	-0.549048
Lymph-BNHL	SP59384	-0.41366
Lymph-BNHL	SP59332	-0.65401
Lymph-BNHL	SP116616	-0.716939
Lymph-BNHL	SP124981	-0.72068
Lymph-BNHL	SP59368	-0.569963
Lymph-BNHL	SP116648	-0.568879
Lymph-BNHL	SP127638	-0.360547
Lymph-BNHL	SP59420	-0.733437
Lymph-BNHL	SP116706	-0.714975
Lymph-BNHL	SP116654	-0.722326
Lymph-BNHL	SP59308	-0.738481
Lymph-BNHL	SP59288	-0.441666
Lymph-BNHL	SP116622	-0.756207
Lymph-BNHL	SP59316	-0.737721
Lymph-BNHL	SP59324	-0.416158
Lymph-BNHL	SP116697	-0.706712
Lymph-BNHL	SP127632	-0.318115
Lymph-BNHL	SP59304	-0.679518
Lymph-BNHL	SP116620	-0.717309
Panc-AdenoCA	SP77443	-0.716647
Panc-AdenoCA	SP72118	-0.658961
Panc-AdenoCA	SP125716	-0.295834
Panc-AdenoCA	SP125746	-0.548765
Panc-AdenoCA	SP76891	-0.723258
Panc-AdenoCA	SP125797	-0.234886
Panc-AdenoCA	SP116965	-0.706645
Panc-AdenoCA	SP77930	-0.41016
Panc-AdenoCA	SP76057	-0.728118
Panc-AdenoCA	SP69565	-0.719423
Panc-AdenoCA	SP75202	-0.702945
Panc-AdenoCA	SP110736	-0.70131
Panc-AdenoCA	SP107774	-0.736489
Panc-AdenoCA	SP125807	-0.294775
Panc-AdenoCA	SP125696	-0.285859
Panc-AdenoCA	SP125725	-0.296622
Panc-AdenoCA	SP125752	-0.403082
Panc-AdenoCA	SP118048	-0.682031
Panc-AdenoCA	SP110779	-0.698235
Panc-AdenoCA	SP117981	-0.125746
Panc-AdenoCA	SP107805	-0.698033
Panc-AdenoCA	SP125749	-0.411575
Panc-AdenoCA	SP110789	-0.721729
Panc-AdenoCA	SP125762	-0.350274
Panc-AdenoCA	SP71846	-0.709854
Panc-AdenoCA	SP117164	-0.718968
Panc-AdenoCA	SP70122	-0.404613
Panc-AdenoCA	SP117002	-0.664284
Panc-AdenoCA	SP117158	-0.750025
Panc-AdenoCA	SP125691	-0.240818
Panc-AdenoCA	SP125721	-0.746277
Panc-AdenoCA	SP71404	-0.415297
Panc-AdenoCA	SP76955	-0.731356
Panc-AdenoCA	SP125753	-0.743847
Panc-AdenoCA	SP117972	-0.732352
Panc-AdenoCA	SP107781	-0.719052
Panc-AdenoCA	SP70202	-0.386141
Panc-AdenoCA	SP70677	-0.724773
Panc-AdenoCA	SP70082	-0.531565
Panc-AdenoCA	SP70288	-0.390724
Panc-AdenoCA	SP70266	-0.721175
Panc-AdenoCA	SP125726	-0.34589
Panc-AdenoCA	SP125800	-0.580329
Panc-AdenoCA	SP107956	-0.704053
Panc-AdenoCA	SP117745	-0.760869
Panc-AdenoCA	SP117351	-0.726902
Panc-AdenoCA	SP70956	-0.715425
Panc-AdenoCA	SP117980	-0.73085
Panc-AdenoCA	SP117878	-0.596856
Panc-AdenoCA	SP125805	-0.717279
Panc-AdenoCA	SP108017	-0.721432
Panc-AdenoCA	SP78013	-0.397609
Panc-AdenoCA	SP118083	-0.633611
Panc-AdenoCA	SP125772	-0.73201
Panc-AdenoCA	SP117216	-0.668547
Panc-AdenoCA	SP125784	-0.364541
Panc-AdenoCA	SP117323	-0.726639
Panc-AdenoCA	SP118046	-0.74929
Panc-AdenoCA	SP71536	-0.36169
Panc-AdenoCA	SP70756	-0.721801
Panc-AdenoCA	SP77888	-0.294755
Panc-AdenoCA	SP125766	-0.533985
Panc-AdenoCA	SP125737	-0.329918
Panc-AdenoCA	SP125763	-0.391719
Panc-AdenoCA	SP125802	-0.361423
Panc-AdenoCA	SP76675	-0.715174
Panc-AdenoCA	SP71480	-0.459141
Panc-AdenoCA	SP70313	-0.709933
Panc-AdenoCA	SP73319	-0.726631
Panc-AdenoCA	SP117656	-0.666784
Panc-AdenoCA	SP77872	-0.722624
Panc-AdenoCA	SP117309	-0.732382
Panc-AdenoCA	SP117201	-0.730942
Panc-AdenoCA	SP125685	-0.361098
Panc-AdenoCA	SP117463	-0.721186
Panc-AdenoCA	SP117568	-0.725391
Panc-AdenoCA	SP125717	-0.336968
Panc-AdenoCA	SP125707	-0.524746
Panc-AdenoCA	SP125794	-0.317859
Panc-AdenoCA	SP125756	-0.241437
Panc-AdenoCA	SP117441	-0.719959
Panc-AdenoCA	SP125780	-0.329768
Panc-AdenoCA	SP107813	-0.723173
Panc-AdenoCA	SP77339	-0.72735
Panc-AdenoCA	SP76017	-0.719106
Panc-AdenoCA	SP125764	-0.755286
Panc-AdenoCA	SP76915	-0.714299
Panc-AdenoCA	SP117690	-0.709092
Panc-AdenoCA	SP71974	-0.713724
Panc-AdenoCA	SP125742	-0.749485
Panc-AdenoCA	SP125804	-0.193334
Panc-AdenoCA	SP125695	-0.300053
Panc-AdenoCA	SP77986	-0.482514
Panc-AdenoCA	SP70178	-0.71952
Panc-AdenoCA	SP125689	-0.229073
Panc-AdenoCA	SP107920	-0.7278
Panc-AdenoCA	SP110798	-0.718805
Panc-AdenoCA	SP117523	-0.726251
Panc-AdenoCA	SP107952	-0.732099
Panc-AdenoCA	SP125694	-0.404073
Panc-AdenoCA	SP125745	-0.311725
Panc-AdenoCA	SP117001	-0.74933
Panc-AdenoCA	SP70465	-0.32604
Panc-AdenoCA	SP117949	-0.736991
Panc-AdenoCA	SP117653	-0.74212
Panc-AdenoCA	SP117522	-0.744785
Panc-AdenoCA	SP70780	-0.725539
Panc-AdenoCA	SP125710	-0.750935
Panc-AdenoCA	SP117214	-0.73185
Panc-AdenoCA	SP110803	-0.347685
Panc-AdenoCA	SP125768	-0.232254
Panc-AdenoCA	SP117722	-0.713401
Panc-AdenoCA	SP107915	-0.722103
Panc-AdenoCA	SP125699	-0.338903
Panc-AdenoCA	SP71132	-0.700178
Panc-AdenoCA	SP125771	-0.17483
Panc-AdenoCA	SP125719	-0.506435
Panc-AdenoCA	SP71552	-0.637206
Panc-AdenoCA	SP69573	-0.380081
Panc-AdenoCA	SP117648	-0.748544
Panc-AdenoCA	SP125760	-0.392055
Panc-AdenoCA	SP75681	-0.730249
Panc-AdenoCA	SP107874	-0.704571
Panc-AdenoCA	SP125770	-0.305539
Panc-AdenoCA	SP110816	-0.711993
Panc-AdenoCA	SP125785	-0.365973
Panc-AdenoCA	SP77203	-0.719538
Panc-AdenoCA	SP76515	-0.717454
Panc-AdenoCA	SP125706	-0.283073
Panc-AdenoCA	SP125705	-0.280533
Panc-AdenoCA	SP125715	-0.737706
Panc-AdenoCA	SP116962	-0.590958
Panc-AdenoCA	SP110770	-0.720922
Panc-AdenoCA	SP117660	-0.724984
Panc-AdenoCA	SP69812	-0.72124
Panc-AdenoCA	SP117643	-0.726142
Panc-AdenoCA	SP125713	-0.252967
Panc-AdenoCA	SP76136	-0.679445
Panc-AdenoCA	SP70106	-0.456598
Panc-AdenoCA	SP108059	-0.719976
Panc-AdenoCA	SP108020	-0.719079
Panc-AdenoCA	SP117760	-0.683627
Panc-AdenoCA	SP116968	-0.740131
Panc-AdenoCA	SP125775	-0.545113
Panc-AdenoCA	SP76867	-0.723335
Panc-AdenoCA	SP125731	-0.421854
Panc-AdenoCA	SP125733	-0.258859
Panc-AdenoCA	SP108088	-0.71302
Panc-AdenoCA	SP78502	-0.43538
Panc-AdenoCA	SP125791	-0.312509
Panc-AdenoCA	SP125755	-0.390558
Panc-AdenoCA	SP117340	-0.714125
Panc-AdenoCA	SP125781	-0.334654
Panc-AdenoCA	SP125783	-0.728956
Panc-AdenoCA	SP71734	-0.294875
Panc-AdenoCA	SP76001	-0.724465
Panc-AdenoCA	SP108033	-0.720319
Panc-AdenoCA	SP110822	-0.330143
Panc-AdenoCA	SP116950	-0.751732
Panc-AdenoCA	SP69762	-0.628887
Panc-AdenoCA	SP125712	-0.366888
Panc-AdenoCA	SP107945	-0.715736
Panc-AdenoCA	SP107770	-0.657259
Panc-AdenoCA	SP73263	-0.707726
Panc-AdenoCA	SP77131	-0.353505
Panc-AdenoCA	SP125786	-0.526908
Panc-AdenoCA	SP75322	-0.731059
Panc-AdenoCA	SP125693	-0.72094
Panc-AdenoCA	SP116949	-0.643185
Panc-AdenoCA	SP78533	-0.441547
Panc-AdenoCA	SP70046	-0.345191
Panc-AdenoCA	SP70932	-0.68416
Panc-AdenoCA	SP117215	-0.710926
Panc-AdenoCA	SP117040	-0.591115
Panc-AdenoCA	SP71758	-0.438049
Panc-AdenoCA	SP71228	-0.278191
Panc-AdenoCA	SP117476	-0.71396
Panc-AdenoCA	SP116985	-0.678388
Panc-AdenoCA	SP125769	-0.45133
Panc-AdenoCA	SP76353	-0.718278
Panc-AdenoCA	SP69587	-0.739274
Panc-AdenoCA	SP125778	-0.215669
Panc-AdenoCA	SP117440	-0.733291
Panc-AdenoCA	SP125730	-0.396092
Panc-AdenoCA	SP125686	-0.408692
Panc-AdenoCA	SP125758	-0.283659
Panc-AdenoCA	SP77848	-0.499549
Panc-AdenoCA	SP117974	-0.726283
Panc-AdenoCA	SP117911	-0.67325
Panc-AdenoCA	SP117165	-0.685631
Panc-AdenoCA	SP117412	-0.752326
Panc-AdenoCA	SP69898	-0.588698
Panc-AdenoCA	SP117650	-0.724508
Panc-AdenoCA	SP117076	-0.749594
Panc-AdenoCA	SP125757	-0.38157
Panc-AdenoCA	SP75977	-0.721531
Panc-AdenoCA	SP70226	-0.722237
Panc-AdenoCA	SP125711	-0.270499
Panc-AdenoCA	SP125811	-0.439652
Panc-AdenoCA	SP125723	-0.423231
Panc-AdenoCA	SP108068	-0.727522
Panc-AdenoCA	SP125809	-0.446435
Panc-AdenoCA	SP125722	-0.455016
Panc-AdenoCA	SP107784	-0.719537
Panc-AdenoCA	SP117908	-0.720269
Panc-AdenoCA	SP125741	-0.377273
Panc-AdenoCA	SP110824	-0.697169
Panc-AdenoCA	SP125724	-0.711436
Panc-AdenoCA	SP76843	-0.723495
Panc-AdenoCA	SP125777	-0.303862
Panc-AdenoCA	SP117291	-0.747539
Panc-AdenoCA	SP71456	-0.670528
Panc-AdenoCA	SP125793	-0.473439
Panc-AdenoCA	SP125744	-0.35657
Panc-AdenoCA	SP125795	-0.357211
Panc-AdenoCA	SP108065	-0.730061
Panc-AdenoCA	SP70860	-0.720672
Panc-AdenoCA	SP125703	-0.334909
Panc-AdenoCA	SP71084	-0.7191
Panc-AdenoCA	SP72262	-0.688385
Panc-AdenoCA	SP69705	-0.70661
Panc-AdenoCA	SP125761	-0.284618
Panc-AdenoCA	SP107786	-0.679997
Panc-AdenoCA	SP117661	-0.672117
Panc-AdenoCA	SP125776	-0.726947
Panc-AdenoCA	SP71576	-0.414042
Panc-AdenoCA	SP117261	-0.728219
Panc-AdenoCA	SP125698	-0.40323
Panc-AdenoCA	SP125714	-0.43154
Panc-AdenoCA	SP108123	-0.66805
Panc-AdenoCA	SP74896	-0.719004
Panc-AdenoCA	SP71950	-0.721333
Panc-AdenoCA	SP77972	-0.4243
Panc-AdenoCA	SP108049	-0.713161
Panc-AdenoCA	SP77866	-0.49981
Panc-AdenoCA	SP125704	-0.302345
Panc-AdenoCA	SP117290	-0.747347
Panc-AdenoCA	SP125738	-0.276857
Head-SCC	SP29914	-0.67959
Head-SCC	SP31046	-0.703369
Head-SCC	SP31334	-0.701196
Head-SCC	SP30011	-0.648153
Head-SCC	SP117260	-0.680194
Head-SCC	SP31174	-0.699027
Head-SCC	SP32662	-0.694352
Head-SCC	SP31126	-0.651918
Head-SCC	SP32958	-0.695436
Head-SCC	SP117124	-0.719977
Head-SCC	SP117932	-0.666155
Head-SCC	SP31422	-0.657249
Head-SCC	SP33496	-0.665963
Head-SCC	SP34005	-0.691222
Head-SCC	SP117189	-0.399924
Head-SCC	SP30113	-0.718857
Head-SCC	SP117217	-0.751714
Head-SCC	SP31030	-0.667279
Head-SCC	SP33544	-0.688481
Head-SCC	SP33688	-0.692959
Head-SCC	SP30907	-0.710698
Head-SCC	SP30185	-0.706512
Head-SCC	SP33837	-0.714899
Head-SCC	SP117779	-0.718454
Head-SCC	SP31790	-0.727053
Head-SCC	SP30143	-0.719583
Head-SCC	SP30071	-0.712313
Head-SCC	SP30493	-0.695125
Head-SCC	SP32014	-0.703088
Head-SCC	SP117376	-0.706911
Head-SCC	SP30332	-0.707671
Head-SCC	SP117681	-0.73546
Head-SCC	SP31814	-0.681441
Head-SCC	SP29987	-0.712384
Head-SCC	SP30083	-0.631627
Head-SCC	SP32742	-0.686101
Head-SCC	SP115162	0.227759
Head-SCC	SP29940	-0.709421
Head-SCC	SP117408	-0.601933
Head-SCC	SP30843	-0.683568
Head-SCC	SP32222	-0.736322
Head-SCC	SP31190	-0.71222
Head-SCC	SP30077	-0.6978
Head-SCC	SP118015	0.602827
Head-SCC	SP32694	-0.724893
Head-SCC	SP33774	-0.690253
Head-SCC	SP30093	-0.683348
Head-SCC	SP33094	-0.70446
Head-SCC	SP30803	-0.714478
Head-SCC	SP30675	-0.692091
Head-SCC	SP117509	-0.530516
Head-SCC	SP31854	-0.686202
Head-SCC	SP31606	-0.566529
Head-SCC	SP30213	-0.684067
Head-SCC	SP117482	-0.742714
Head-SCC	SP117003	-0.383636
Head-SCC	SP32894	-0.660265
Uterus-AdenoCA	SP95454	-0.711228
Uterus-AdenoCA	SP94741	-0.280988
Uterus-AdenoCA	SP90209	-0.619499
Uterus-AdenoCA	SP90989	-0.73486
Uterus-AdenoCA	SP93540	-0.716251
Uterus-AdenoCA	SP93227	-0.671068
Uterus-AdenoCA	SP94348	0.54594
Uterus-AdenoCA	SP94588	-0.655169
Uterus-AdenoCA	SP90725	-0.512431
Uterus-AdenoCA	SP94236	-0.725238
Uterus-AdenoCA	SP93772	-0.71916
Uterus-AdenoCA	SP92195	-0.685898
Uterus-AdenoCA	SP89957	-0.627958
Uterus-AdenoCA	SP92268	-0.731289
Uterus-AdenoCA	SP92707	-0.706757
Uterus-AdenoCA	SP89687	-0.707719
Uterus-AdenoCA	SP94933	-0.719489
Uterus-AdenoCA	SP95126	0.557283
Uterus-AdenoCA	SP95646	-0.728679
Uterus-AdenoCA	SP89443	-0.721846
Uterus-AdenoCA	SP89651	0.398735
Uterus-AdenoCA	SP94060	-0.704677
Uterus-AdenoCA	SP92787	-0.71205
Uterus-AdenoCA	SP92723	-0.71492
Uterus-AdenoCA	SP92364	-0.650875
Uterus-AdenoCA	SP95406	0.690367
Uterus-AdenoCA	SP91746	-0.653393
Uterus-AdenoCA	SP92332	-0.74297
Uterus-AdenoCA	SP91730	-0.688722
Uterus-AdenoCA	SP92947	-0.711843
Uterus-AdenoCA	SP91666	-0.690114
Uterus-AdenoCA	SP90245	0.377649
Uterus-AdenoCA	SP90893	-0.728441
Uterus-AdenoCA	SP89519	-0.69923
Uterus-AdenoCA	SP92659	-0.718015
Uterus-AdenoCA	SP94332	-0.215891
Uterus-AdenoCA	SP94661	-0.685848
Uterus-AdenoCA	SP93652	-0.599163
Uterus-AdenoCA	SP90125	-0.710142
Uterus-AdenoCA	SP94540	0.242707
Uterus-AdenoCA	SP95222	-0.719276
Uterus-AdenoCA	SP89389	-0.694877
Uterus-AdenoCA	SP90503	-0.713424
Uterus-AdenoCA	SP92460	-0.737963
Uterus-AdenoCA	SP92931	-0.739437
Uterus-AdenoCA	SP91265	-0.661954
Uterus-AdenoCA	SP89909	-0.568562
Uterus-AdenoCA	SP90629	-0.71527
Uterus-AdenoCA	SP95550	0.645728
Bone-Osteosarc	SP116515	-0.728632
Bone-Osteosarc	SP116499	-0.725335
Bone-Osteosarc	SP116505	-0.745121
Bone-Osteosarc	SP116509	-0.702515
Bone-Osteosarc	SP116437	-0.717825
Bone-Osteosarc	SP116512	-0.72368
Bone-Osteosarc	SP116465	-0.700408
Bone-Osteosarc	SP116496	-0.615577
Bone-Osteosarc	SP116525	-0.726008
Bone-Osteosarc	SP116481	-0.662861
Bone-Osteosarc	SP116586	-0.667767
Bone-Osteosarc	SP116528	-0.740112
Bone-Osteosarc	SP116589	-0.652126
Bone-Osteosarc	SP116406	-0.663506
Bone-Osteosarc	SP116484	-0.731997
Bone-Osteosarc	SP116453	-0.714656
Bone-Osteosarc	SP116469	-0.732095
Bone-Osteosarc	SP116578	-0.703355
Bone-Osteosarc	SP116531	-0.732944
Bone-Osteosarc	SP116593	-0.670964
Bone-Osteosarc	SP116487	-0.690395
Bone-Osteosarc	SP116472	-0.716239
Bone-Osteosarc	SP116518	-0.727042
Bone-Osteosarc	SP116412	-0.574491
Bone-Osteosarc	SP116534	-0.239829
Bone-Osteosarc	SP116596	-0.649003
Bone-Osteosarc	SP116490	-0.632536
Bone-Osteosarc	SP116459	-0.719159
Bone-Osteosarc	SP116475	-0.713412
Bone-Osteosarc	SP116520	-0.221909
Bone-Osteosarc	SP116431	-0.701015
Bone-Osteosarc	SP116582	-0.668757
Bone-Osteosarc	SP116599	-0.245729
Bone-Osteosarc	SP116478	-0.677365
Bone-Osteosarc	SP116462	-0.700095
Bone-Osteosarc	SP116523	-0.711419
Bone-Osteosarc	SP116434	-0.709381
Ovary-AdenoCA	SP61553	-0.667579
Ovary-AdenoCA	SP101845	-0.643122
Ovary-AdenoCA	SP101682	-0.692709
Ovary-AdenoCA	SP101724	-0.688324
Ovary-AdenoCA	SP102103	-0.760097
Ovary-AdenoCA	SP61703	-0.693426
Ovary-AdenoCA	SP102174	-0.747568
Ovary-AdenoCA	SP59707	-0.716013
Ovary-AdenoCA	SP101622	-0.638812
Ovary-AdenoCA	SP102161	-0.757668
Ovary-AdenoCA	SP68659	-0.725134
Ovary-AdenoCA	SP101654	-0.699248
Ovary-AdenoCA	SP62616	-0.708015
Ovary-AdenoCA	SP59761	-0.695188
Ovary-AdenoCA	SP66960	-0.640113
Ovary-AdenoCA	SP102074	-0.709663
Ovary-AdenoCA	SP61453	-0.688794
Ovary-AdenoCA	SP63796	0.517031
Ovary-AdenoCA	SP69155	0.377458
Ovary-AdenoCA	SP59950	-0.722742
Ovary-AdenoCA	SP101694	-0.719266
Ovary-AdenoCA	SP101616	-0.664904
Ovary-AdenoCA	SP101666	-0.612322
Ovary-AdenoCA	SP101558	-0.728771
Ovary-AdenoCA	SP59938	0.617403
Ovary-AdenoCA	SP64976	-0.70802
Ovary-AdenoCA	SP64296	-0.660512
Ovary-AdenoCA	SP65807	-0.715551
Ovary-AdenoCA	SP59803	-0.704377
Ovary-AdenoCA	SP102096	-0.761123
Ovary-AdenoCA	SP102084	-0.680507
Ovary-AdenoCA	SP101580	-0.708873
Ovary-AdenoCA	SP66159	-0.575864
Ovary-AdenoCA	SP63356	-0.689008
Ovary-AdenoCA	SP102064	-0.74385
Ovary-AdenoCA	SP68348	-0.720186
Ovary-AdenoCA	SP101564	-0.714939
Ovary-AdenoCA	SP101921	-0.712926
Ovary-AdenoCA	SP101648	-0.732169
Ovary-AdenoCA	SP101628	-0.726063
Ovary-AdenoCA	SP62450	-0.719413
Ovary-AdenoCA	SP67428	-0.710277
Ovary-AdenoCA	SP101708	-0.671957
Ovary-AdenoCA	SP61713	-0.667124
Ovary-AdenoCA	SP102055	-0.721901
Ovary-AdenoCA	SP101634	-0.728363
Ovary-AdenoCA	SP68725	-0.72835
Ovary-AdenoCA	SP101588	-0.657138
Ovary-AdenoCA	SP101584	-0.729292
Ovary-AdenoCA	SP101686	-0.727429
Ovary-AdenoCA	SP101532	-0.744061
Ovary-AdenoCA	SP101732	-0.645359
Ovary-AdenoCA	SP101528	-0.732195
Ovary-AdenoCA	SP67609	-0.618369
Ovary-AdenoCA	SP101536	-0.729483
Ovary-AdenoCA	SP62110	-0.577738
Ovary-AdenoCA	SP64546	-0.68826
Ovary-AdenoCA	SP63546	-0.685111
Ovary-AdenoCA	SP60322	-0.109651
Ovary-AdenoCA	SP101576	-0.72821
Ovary-AdenoCA	SP102015	-0.721473
Ovary-AdenoCA	SP102168	-0.74535
Ovary-AdenoCA	SP60243	-0.714772
Ovary-AdenoCA	SP101716	-0.736558
Ovary-AdenoCA	SP63966	-0.711207
Ovary-AdenoCA	SP101592	-0.733355
Ovary-AdenoCA	SP60362	-0.697065
Ovary-AdenoCA	SP69077	-0.705973
Ovary-AdenoCA	SP101658	-0.742268
Ovary-AdenoCA	SP102045	-0.748542
Ovary-AdenoCA	SP67346	-0.677766
Ovary-AdenoCA	SP66687	-0.687389
Ovary-AdenoCA	SP101552	-0.751504
Ovary-AdenoCA	SP101519	-0.712912
Ovary-AdenoCA	SP101690	-0.756911
Ovary-AdenoCA	SP102123	-0.72032
Ovary-AdenoCA	SP63716	-0.711951
Ovary-AdenoCA	SP101662	-0.708867
Ovary-AdenoCA	SP101600	-0.704535
Ovary-AdenoCA	SP101544	-0.688757
Ovary-AdenoCA	SP102133	-0.733191
Ovary-AdenoCA	SP101881	-0.709431
Ovary-AdenoCA	SP65376	-0.686001
Ovary-AdenoCA	SP102035	-0.6558
Ovary-AdenoCA	SP61343	-0.721255
Ovary-AdenoCA	SP101642	-0.736012
Ovary-AdenoCA	SP60001	-0.709184
Ovary-AdenoCA	SP101596	-0.70512
Ovary-AdenoCA	SP101670	-0.710524
Ovary-AdenoCA	SP101674	-0.732931
Ovary-AdenoCA	SP101572	-0.723109
Ovary-AdenoCA	SP101678	-0.745654
Ovary-AdenoCA	SP59860	-0.680681
Ovary-AdenoCA	SP101740	-0.514497
Ovary-AdenoCA	SP101891	-0.727612
Ovary-AdenoCA	SP102143	-0.72981
Ovary-AdenoCA	SP102113	-0.698662
Ovary-AdenoCA	SP101521	-0.736771
Ovary-AdenoCA	SP101526	-0.637279
Ovary-AdenoCA	SP101540	-0.68735
Ovary-AdenoCA	SP101604	-0.733443
Ovary-AdenoCA	SP60610	-0.680467
Ovary-AdenoCA	SP101548	-0.706814
Ovary-AdenoCA	SP101523	-0.157485
Ovary-AdenoCA	SP102090	-0.734365
Ovary-AdenoCA	SP101795	-0.728962
Ovary-AdenoCA	SP102187	-0.744672
Ovary-AdenoCA	SP101515	-0.268352
Ovary-AdenoCA	SP101931	-0.729873
Ovary-AdenoCA	SP101610	-0.731372
Ovary-AdenoCA	SP64036	-0.705566
Ovary-AdenoCA	SP60842	-0.688152
Breast-AdenoCA	SP2149	-0.636248
Breast-AdenoCA	SP117956	-0.620309
Breast-AdenoCA	SP117975	-0.721581
Breast-AdenoCA	SP7692	-0.379117
Breast-AdenoCA	SP5052	-0.72032
Breast-AdenoCA	SP7785	-0.718781
Breast-AdenoCA	SP3415	-0.393836
Breast-AdenoCA	SP2799	-0.730245
Breast-AdenoCA	SP9979	-0.736153
Breast-AdenoCA	SP5393	-0.68964
Breast-AdenoCA	SP13036	-0.671696
Breast-AdenoCA	SP7421	-0.711125
Breast-AdenoCA	SP4875	-0.624205
Breast-AdenoCA	SP8795	-0.713034
Breast-AdenoCA	SP4820	-0.687365
Breast-AdenoCA	SP4593	-0.534094
Breast-AdenoCA	SP8085	-0.705587
Breast-AdenoCA	SP11235	-0.226925
Breast-AdenoCA	SP6730	-0.636051
Breast-AdenoCA	SP10635	-0.72418
Breast-AdenoCA	SP5381	-0.732421
Breast-AdenoCA	SP10084	-0.680253
Breast-AdenoCA	SP9251	-0.727186
Breast-AdenoCA	SP3016	-0.718287
Breast-AdenoCA	SP11045	-0.573938
Breast-AdenoCA	SP2826	0.446534
Breast-AdenoCA	SP11171	-0.383265
Breast-AdenoCA	SP5784	-0.715839
Breast-AdenoCA	SP8564	-0.717274
Breast-AdenoCA	SP5844	-0.717048
Breast-AdenoCA	SP6519	-0.725561
Breast-AdenoCA	SP6766	-0.721623
Breast-AdenoCA	SP5448	-0.726129
Breast-AdenoCA	SP12049	-0.699514
Breast-AdenoCA	SP2714	-0.722238
Breast-AdenoCA	SP2801	0.247694
Breast-AdenoCA	SP8891	-0.704366
Breast-AdenoCA	SP9481	-0.723408
Breast-AdenoCA	SP5808	-0.703448
Breast-AdenoCA	SP6429	-0.63314
Breast-AdenoCA	SP5017	0.23007
Breast-AdenoCA	SP8229	-0.736211
Breast-AdenoCA	SP8157	-0.724848
Breast-AdenoCA	SP5279	-0.721168
Breast-AdenoCA	SP8660	-0.686725
Breast-AdenoCA	SP11878	-0.637342
Breast-AdenoCA	SP9433	-0.737605
Breast-AdenoCA	SP2881	-0.69662
Breast-AdenoCA	SP7378	-0.40255
Breast-AdenoCA	SP9816	-0.715143
Breast-AdenoCA	SP4265	0.317041
Breast-AdenoCA	SP2793	-0.707971
Breast-AdenoCA	SP6825	-0.682738
Breast-AdenoCA	SP4523	-0.702365
Breast-AdenoCA	SP9930	-0.719612
Breast-AdenoCA	SP5820	-0.587873
Breast-AdenoCA	SP10470	0.113734
Breast-AdenoCA	SP4535	-0.407242
Breast-AdenoCA	SP11808	-0.663707
Breast-AdenoCA	SP96163	-0.696539
Breast-AdenoCA	SP11948	-0.663746
Breast-AdenoCA	SP4557	-0.351672
Breast-AdenoCA	SP96147	-0.709502
Breast-AdenoCA	SP10150	-0.699695
Breast-AdenoCA	SP4472	-0.712137
Breast-AdenoCA	SP6813	-0.732326
Breast-AdenoCA	SP96511	-0.704766
Breast-AdenoCA	SP5636	-0.729896
Breast-AdenoCA	SP5559	-0.665381
Breast-AdenoCA	SP3631	-0.732501
Breast-AdenoCA	SP5473	-0.726653
Breast-AdenoCA	SP8394	-0.605515
Breast-AdenoCA	SP6115	-0.700652
Breast-AdenoCA	SP7291	-0.717576
Breast-AdenoCA	SP2997	-0.71906
Breast-AdenoCA	SP8831	0.657094
Breast-AdenoCA	SP2731	-0.731107
Breast-AdenoCA	SP6223	-0.718257
Breast-AdenoCA	SP2357	-0.65086
Breast-AdenoCA	SP2144	-0.695618
Breast-AdenoCA	SP2145	0.0155562
Breast-AdenoCA	SP2147	-0.715671
Breast-AdenoCA	SP2146	-0.654287
Breast-AdenoCA	SP2148	-0.720995
Breast-AdenoCA	SP2150	-0.751257
Breast-AdenoCA	SP2152	-0.747533
Breast-AdenoCA	SP2349	-0.714413
Breast-AdenoCA	SP2155	-0.721619
Breast-AdenoCA	SP2154	-0.740474
Breast-AdenoCA	SP2158	-0.7219
Breast-AdenoCA	SP2156	0.659095
Breast-AdenoCA	SP2159	0.405361
Breast-AdenoCA	SP2153	-0.679759
Breast-AdenoCA	SP2160	-0.74036
Breast-AdenoCA	SP2151	-0.733845
Breast-AdenoCA	SP7171	-0.735674
Breast-AdenoCA	SP10563	-0.142519
Breast-AdenoCA	SP8987	0.0779536
Breast-AdenoCA	SP117113	-0.74786
Breast-AdenoCA	SP117245	-0.755033
Breast-AdenoCA	SP117402	-0.722162
Breast-AdenoCA	SP117136	-0.738045
Breast-AdenoCA	SP117378	-0.751224
Breast-AdenoCA	SP116947	-0.739648
Breast-AdenoCA	SP117369	-0.760235
Breast-AdenoCA	SP117244	-0.746955
Breast-AdenoCA	SP117162	-0.721474
Breast-AdenoCA	SP117079	-0.737983
Breast-AdenoCA	SP117344	-0.707711
Breast-AdenoCA	SP118074	-0.707675
Breast-AdenoCA	SP117598	-0.738216
Breast-AdenoCA	SP117312	-0.736895
Breast-AdenoCA	SP118038	-0.654504
Breast-AdenoCA	SP117552	-0.721008
Breast-AdenoCA	SP118073	-0.742335
Breast-AdenoCA	SP117933	-0.754771
Breast-AdenoCA	SP118012	-0.720141
Breast-AdenoCA	SP117108	-0.645162
Breast-AdenoCA	SP5980	-0.523221
Breast-AdenoCA	SP12186	-0.740649
Breast-AdenoCA	SP10944	-0.704517
Breast-AdenoCA	SP116341	-0.736148
Breast-AdenoCA	SP116331	-0.680649
Breast-AdenoCA	SP116351	-0.734732
Breast-AdenoCA	SP116371	-0.690963
Breast-AdenoCA	SP116361	-0.72312
Breast-AdenoCA	SP116343	-0.739837
Breast-AdenoCA	SP116333	-0.711122
Breast-AdenoCA	SP116373	-0.466211
Breast-AdenoCA	SP116363	-0.732227
Breast-AdenoCA	SP116353	-0.728159
Breast-AdenoCA	SP2766	-0.701273
Breast-AdenoCA	SP116345	-0.714829
Breast-AdenoCA	SP116365	-0.732884
Breast-AdenoCA	SP116375	0.307042
Breast-AdenoCA	SP116335	-0.71893
Breast-AdenoCA	SP117812	-0.71542
Breast-AdenoCA	SP117354	-0.555052
Breast-AdenoCA	SP117370	-0.727323
Breast-AdenoCA	SP116991	-0.695154
Breast-AdenoCA	SP117629	-0.697543
Breast-AdenoCA	SP124199	-0.446189
Breast-AdenoCA	SP124195	-0.394902
Breast-AdenoCA	SP117850	-0.734842
Breast-AdenoCA	SP117127	-0.730951
Breast-AdenoCA	SP117614	-0.736106
Breast-AdenoCA	SP116948	-0.739643
Breast-AdenoCA	SP117409	-0.721933
Breast-AdenoCA	SP117593	-0.726105
Breast-AdenoCA	SP117372	-0.731007
Breast-AdenoCA	SP118077	-0.70693
Breast-AdenoCA	SP117840	-0.738874
Breast-AdenoCA	SP117363	-0.695378
Breast-AdenoCA	SP117887	-0.737069
Breast-AdenoCA	SP116946	-0.761656
Breast-AdenoCA	SP117901	-0.724578
Breast-AdenoCA	SP117454	-0.745958
Breast-AdenoCA	SP124197	-0.319564
Breast-AdenoCA	SP117919	-0.74425
Breast-AdenoCA	SP117250	-0.746049
Breast-AdenoCA	SP117983	-0.724666
Breast-AdenoCA	SP117676	-0.723424
Breast-AdenoCA	SP117011	-0.760826
Breast-AdenoCA	SP117057	-0.729003
Breast-AdenoCA	SP117126	-0.762983
Breast-AdenoCA	SP117728	-0.739095
Breast-AdenoCA	SP117618	-0.731426
Breast-AdenoCA	SP117257	-0.723486
Breast-AdenoCA	SP116963	-0.731847
Breast-AdenoCA	SP117078	-0.738683
Breast-AdenoCA	SP117944	-0.748809
Breast-AdenoCA	SP117639	-0.702248
Breast-AdenoCA	SP117834	-0.724996
Breast-AdenoCA	SP117105	-0.434416
Breast-AdenoCA	SP117785	-0.722206
Breast-AdenoCA	SP117882	-0.739213
Breast-AdenoCA	SP117778	-0.730282
Breast-AdenoCA	SP117032	-0.716134
Breast-AdenoCA	SP117710	-0.719826
Breast-AdenoCA	SP117538	-0.743311
Breast-AdenoCA	SP124207	-0.221548
Breast-AdenoCA	SP117800	-0.708474
Breast-AdenoCA	SP117724	-0.744942
Breast-AdenoCA	SP124193	-0.421181
Breast-AdenoCA	SP116355	-0.714596
Breast-AdenoCA	SP116347	-0.44424
Breast-AdenoCA	SP116367	-0.370432
Breast-AdenoCA	SP116339	-0.687639
Breast-AdenoCA	SP116349	-0.739173
Breast-AdenoCA	SP116357	-0.658114
Breast-AdenoCA	SP116359	-0.154102
Breast-AdenoCA	SP116369	-0.69684
Breast-AdenoCA	SP116377	-0.715039
Breast-AdenoCA	SP116379	-0.697514
Breast-AdenoCA	SP6673	-0.688992
Neuroblastoma	P13264	-0.734077
Neuroblastoma	P13967	-0.72895
Neuroblastoma	P14104	-0.735099
Neuroblastoma	P15239	-0.417531
Neuroblastoma	P15303	-0.750359
Neuroblastoma	P15403	-0.71381
Neuroblastoma	P16885	-0.755949
Neuroblastoma	P1695	-0.725725
Neuroblastoma	P17240	-0.759756
Neuroblastoma	P17344	-0.757009
Neuroblastoma	P17612	-0.751974
Neuroblastoma	P17683	-0.735673
Neuroblastoma	P17831	-0.73666
Neuroblastoma	P17861	-0.736154
Neuroblastoma	P18478	-0.765106
Neuroblastoma	P18699	-0.748209
Neuroblastoma	P18728	-0.728059
Neuroblastoma	P18972	-0.759293
Neuroblastoma	P19073	-0.708109
Neuroblastoma	P19537	-0.693794
Neuroblastoma	P19743	-0.768491
Neuroblastoma	P19751	-0.72913
Neuroblastoma	P19885	-0.738573
Neuroblastoma	P20471	-0.724078
Neuroblastoma	P20507	-0.716054
Neuroblastoma	P20807	-0.739702
Neuroblastoma	P20865	-0.761295
Neuroblastoma	P20920	-0.738124
Neuroblastoma	P21368	-0.70961
Neuroblastoma	P21442	-0.736861
Neuroblastoma	P21641	-0.743548
Neuroblastoma	P21702	0.291936
Neuroblastoma	P21776	-0.684442
Neuroblastoma	P21788	-0.710148
Neuroblastoma	P21924	-0.433789
Neuroblastoma	P22265	-0.748114
Neuroblastoma	P22283	-0.75147
Neuroblastoma	P22335	-0.700128
Neuroblastoma	P22388	-0.739751
Neuroblastoma	P22396	-0.697804
Neuroblastoma	P22496	0.753456
Neuroblastoma	P23067	-0.706953
Neuroblastoma	P23103	0.194949
Neuroblastoma	P23122	-0.667998
Neuroblastoma	P23206	-0.449545
Neuroblastoma	P23229	-0.658538
Neuroblastoma	P23267	0.589082
Neuroblastoma	P24478	0.720112
Neuroblastoma	P24632	0.737519
Neuroblastoma	P24679	0.380301
Neuroblastoma	P24702	0.759262
Neuroblastoma	P24719	-0.710496
Neuroblastoma	P24885	0.766529
Neuroblastoma	P25114	0.555742
Neuroblastoma	P25262	0.685134
Neuroblastoma	P25376	0.742622
CNS-Medullo	SP78927	-0.707928
CNS-Medullo	SP78913	-0.627192
CNS-Medullo	SP107375	0.491713
CNS-Medullo	SP107408	0.46212
CNS-Medullo	SP78816	-0.733324
CNS-Medullo	SP78663	-0.729632
CNS-Medullo	SP78709	-0.730336
CNS-Medullo	SP107462	-0.718105
CNS-Medullo	SP78951	-0.734069
CNS-Medullo	SP107435	0.751843
CNS-Medullo	SP78679	-0.720891
CNS-Medullo	SP107360	-0.723813
CNS-Medullo	SP78819	-0.681408
CNS-Medullo	SP78821	-0.732393
CNS-Medullo	SP107552	-0.586692
CNS-Medullo	SP78865	0.0534514
CNS-Medullo	SP107470	-0.343994
CNS-Medullo	SP78673	-0.736069
CNS-Medullo	SP78824	-0.6745
CNS-Medullo	SP107550	0.578098
CNS-Medullo	SP78718	-0.701172
CNS-Medullo	SP107451	-0.664282
CNS-Medullo	SP107557	-0.622084
CNS-Medullo	SP107358	-0.721123
CNS-Medullo	SP78731	-0.733027
CNS-Medullo	SP107455	-0.730556
CNS-Medullo	SP107549	-0.627677
CNS-Medullo	SP78814	-0.714318
CNS-Medullo	SP107357	-0.716633
CNS-Medullo	SP78919	-0.688701
CNS-Medullo	SP107453	-0.723391
CNS-Medullo	SP78719	-0.732996
CNS-Medullo	SP78662	-0.7337
CNS-Medullo	SP107457	-0.724683
CNS-Medullo	SP107404	-0.722446
CNS-Medullo	SP78714	-0.743403
CNS-Medullo	SP107454	-0.736849
CNS-Medullo	SP107359	-0.712207
CNS-Medullo	SP78664	-0.736623
CNS-Medullo	SP78931	-0.719584
CNS-Medullo	SP78815	-0.729587
CNS-Medullo	SP107466	-0.727879
CNS-Medullo	SP78901	0.483528
CNS-Medullo	SP107384	-0.733616
CNS-Medullo	SP107467	-0.719148
CNS-Medullo	SP78680	-0.741941
CNS-Medullo	SP78672	-0.730733
CNS-Medullo	SP107365	-0.750191
CNS-Medullo	SP78660	-0.7319
CNS-Medullo	SP78659	-0.717953
CNS-Medullo	SP107449	0.7146
CNS-Medullo	SP78813	-0.73202
CNS-Medullo	SP78953	-0.73214
CNS-Medullo	SP78804	-0.724132
CNS-Medullo	SP107460	-0.714313
CNS-Medullo	SP107548	-0.183497
CNS-Medullo	SP78730	-0.721875
CNS-Medullo	SP78727	-0.731423
CNS-Medullo	SP78822	-0.694527
CNS-Medullo	SP78818	-0.722903
CNS-Medullo	SP78923	-0.0773049
CNS-Medullo	SP107405	-0.739862
CNS-Medullo	SP107437	0.51068
CNS-Medullo	SP78675	-0.726021
CNS-Medullo	SP107371	-0.682225
CNS-Medullo	SP107556	-0.297747
CNS-Medullo	SP78807	-0.706334
CNS-Medullo	SP78945	-0.734769
CNS-Medullo	SP107480	0.330996
CNS-Medullo	SP107448	0.748061
CNS-Medullo	SP107436	0.0769629
CNS-Medullo	SP79150	-0.72631
CNS-Medullo	SP107546	0.615767
CNS-Medullo	SP107459	-0.725241
CNS-Medullo	SP78823	-0.720466
CNS-Medullo	SP78666	-0.728585
CNS-Medullo	SP78721	-0.746675
CNS-Medullo	SP78665	-0.734778
CNS-Medullo	SP78935	-0.739271
CNS-Medullo	SP107458	-0.720913
CNS-Medullo	SP79160	-0.748408
CNS-Medullo	SP107479	-0.687041
CNS-Medullo	SP107377	0.136041
CNS-Medullo	SP78937	-0.724381
CNS-Medullo	SP107444	-0.7299
CNS-Medullo	SP79144	-0.729896
CNS-Medullo	SP107469	-0.727765
CNS-Medullo	SP107373	0.377585
CNS-Medullo	SP107406	-0.763498
CNS-Medullo	SP107369	-0.72229
CNS-Medullo	SP107403	-0.737322
CNS-Medullo	SP107363	-0.713115
CNS-Medullo	SP78955	-0.746507
CNS-Medullo	SP78711	-0.727463
CNS-Medullo	SP78677	-0.730952
CNS-Medullo	SP78805	-0.719547
CNS-Medullo	SP107461	-0.731406
CNS-Medullo	SP107472	-0.723494
CNS-Medullo	SP107356	-0.729284
CNS-Medullo	SP78825	-0.727703
CNS-Medullo	SP107468	-0.741879
CNS-Medullo	SP78851	-0.661591
CNS-Medullo	SP78726	-0.709132
CNS-Medullo	SP107379	-0.681952
CNS-Medullo	SP107474	0.416163
CNS-Medullo	SP107438	0.303832
CNS-Medullo	SP107478	0.155115
CNS-Medullo	SP78716	-0.283939
CNS-Medullo	SP78676	-0.726908
CNS-Medullo	SP107443	-0.639633
[truncated: 771 more rows]
