# Supplementary material for: Cell type-specific DNA replication initiation and termination in human primary cancer whole genomes
Source: Research Square preprint supplement (doi:10.21203/rs.3.rs-3266108/v1), 2023-09-18
Supplement: Supplementary file 2 [file 4a52929efb8306024840b9cb.docx]

**Methods**

**Dataset**

The reference replication timing (RT) was profiled from WGS of 6 unsynchronised, flow-sorted lymphoblastoid cell lines (LCLs; with one experiment repetition) (Koren et al. 2012). The tumour RT was profiled from WGS of 256 primary tumour samples across three cancer types, including 101 small cell lung cancers (SCLC) (George et al. 2015), 56 neuroblastomas (NB) (Peifer et al. 2015), and 96 chronic lymphocytic leukemia cells (CLL) (Puente et al. 2011). The normal RT was profiled from WGS of 92 (out of 101) adjacent normal lung tissues of the same SCLC patients (SCLC-NL). Additionally, the validation tumour RT was profiled from WGS of 8 unsynchronised, neuroblastoma cell lines (NB-CL) (Rosswog et al. 2021).

**Quantification and normalization of WGS data**

All paired reads were aligned to the GRCh37 human reference genome (hs37d5) using BWA (version 0.7.15-r1140) with the parameters -T 0 -M -Y using our in-house analysis pipeline as previously described (Peifer et al. 2012, 2015). As for the LCL reference genome, single-end reads were aligned by GATK (version 4.0.0) Best Practices’ pre-processing workflow. To ensure cross-comparability, the human reference genome was uniformly partitioned into ~2.6 million non-overlapping 1 kb windows (Hawkins et al. 2013; Sasaki et al. 2017). Sequencing read depth/counts per 1 kb window were calculated by Sclust copy number analysis tool (Cun et al. 2018), followed by local GC content correction for each window. As for cancer genomes, read counts were further corrected for copy number states estimated by Sclust to avoid bias from somatic alterations. Partitioned windows with zero reads were precluded from downstream analyses. Reads per kilobase, per million (RPKM) normalization were performed in each library (Sasaki et al. 2017; Tubbs et al. 2018).

Median normalized read counts (median RPKM) were then calculated across different samples or cells in the respective subgroups or cell populations (Woodfine et al. 2004). By doing so, we can also average out the putative sequence-specific replication timing between individuals (Ryba et al. 2012; Koren et al. 2014; Sasaki et al. 2017), copy number variations between normal samples (Marchal et al. 2018), and potential asynchronous replication of chromosomes between tumour samples (Marchal, Sima, and Gilbert 2019).

**Flow cytometry**

Human cancer cell lines were cultured in 175 cm² cell culture flasks. Cells were trypsinized and cell suspension was passed through a 40 µm cell strainer. 1x106 cells were resuspended in 200 µl PBS and permeabilized in 4 ml 70% ethanol on ice and stored at -20°C over night. The next day, cells were centrifuged (250 rcf, 10 min, 4 °C), supernatant was removed, and cells were stained in 1 ml PI (Propidium Iodide 40 µg/ml, RNase A 100 µg/ml, PBS) at 37°C for 30 min. Finally, Dean-Jett-Fox algorithm from the FlowJo 7.6 software was used for data processing.

**Reconstruction of LCL reference S to G1 RT profile**

The LCL reference replication timing profile was calculated from the S/G1 (S to G1) read depth ratio, by comparing the difference between proliferating and resting reads as broadly described (Woodfine et al. 2004; Ryba et al. 2011; Koren et al. 2012; Tubbs et al. 2018). S/G1 ratios were log2 transformed, and scaled to a genome-wide mean of 0 and SD of 1 (Koren et al. 2012) to ensure cross-comparability. Early and late replication timing regions were defined by log2 ratios greater than or less than 0. Smoothed read depth and timing profiles were performed on total 1 kb windows using the smooth.spline package with the default parameters in R (<https://www.r-project.org>).

Then RT profiles were visualised by purpose-written R scripts using chromosome and cytoband information (chromInfo.txt.gz and cytoBand.txt.gz) downloaded from UCSC Genome Browser (hg19; <http://hgdownload.cse.ucsc.edu/goldenPath/hg19/database>).

**Signal-to-noise ratio**

The strength of the replication timing signal was determined by standard deviation of the timing profile (black smoothed line in Figure 1a; bottom panel). The strength of replication timing noise was determined by standard deviation of the difference between original read depth ratios (un-smoothed red and blue dots in Figure 1a; bottom panel) and the timing profile.

**Replication timing skew (RTS)**

The RTS values were computed as the difference between the proportions of early-replicating (E) and late-replicating (L) 1 kb windows in each chromosome as:

RTS = (E – L) / (E + L).

**Defining the direction of replication fork movement**

The replication timing profile can be used to determine the direction of replication fork movement (Audit et al. 2013; Hawkins et al. 2013). Due to bi-directional replication (Ticau et al. 2015; Aria and Yeeles 2019), rightward- and leftward-moving forks present descending and ascending slopes along the timing profile, respectively (Fig. 5a, top).

**Bootstrap-based replication fork directionality (RFD)**

Non-parametric bootstrap resampling was performed 1,000 times for each genome, followed by reconstructing 1,000 resampled replication timing profiles. The direction of fork movement was determined by the slope from each resampled timing profile, resulting in 1,000 resampled forks/slopes for each 1 kb window. In line with the principle of directional sequencing of Okazaki fragments (OK-seq) (Petryk et al. 2016), proposed bootstrap-based RFD values (Fig. 5b) were computed as the difference between the proportions of resampled rightward- (R) and leftward-moving (L) forks/slopes in each 1 kb window as:

RFD = (R – L) / (R + L).

**Defining timing transition region (TTR) by bootstrap RFD**

Flat horizontal segments (reaching RFD = 1 or RFD = -1) along the RFD profiles indicate near-consistent/non-random resampling results in each 1 kb window (Fig. 5c, bottom panel). |RFD| > 0.9 confidence interval constructed by bootstrapping was applied to define the timing transition region (TTR) across the genomes (Fig. 5e). It is worth noting that the choice of a 0.9 threshold was based on the measurement of nearly complete Okazaki fragments captured by OK-seq (Petryk et al. 2016). RFD > 0.9 (orange regions in Fig. 5e,f) represents predominant (>900) rightward-moving forks in each 1 kb window upon 1,000 bootstrap resamplings, and *vice versa* for the RFD < -0.9 (skyblue regions in Fig. 5e,f).

**Defining constant timing region** **(CTR) by bootstrap RFD**

Vertical ascending and descending segments (centered on RFD = 0) along the RFD profiles indicate inconsistent/random resampling results in each 1 kb window (Fig. 5c, bottom panel). |RFD| < 0.9 threshold was accordingly applied to define the constant timing region (CTR) across the genomes (white bars in Fig. 5e). The slope of each 1 kb window from the vertical segments along the RFD profiles was estimated within a 20-kb sliding window (stepped by 1 kb) using the rollapply function from the zoo package in R (Reijns et al. 2015). It is worth noting that the slope of the RFD profile described here (Fig. 5c, bottom panel) is a different measurement/concept compared to the slope of the timing profile mentioned above (Fig. 5c, top panel). A 20 kb sliding window was applied and resulted in around 0.2%~0.3% undefined CTR loci across the autosomes in the respective genomes (green dots in Extended Data Fig. 7). Notably, the choice of 15 kb sliding window used by OK-seq (Petryk et al. 2016; Tubbs et al. 2018) resulted in around 0.2~0.6% undefined CTR loci across the autosomes. Therefore, the difference between the two is marginal (green dots in Extended Data Fig. 7).

**Random down-sampling analysis**

In this analysis, we equally and randomly divided M2 and M1 tumours into two test populations in the respective normal and cancer genomes (Extended Data Fig. 8). Thus, we equally distributed every possible origin and terminus usage in a population into two independent test sets, and at the same time maintained the same composition between M2 and M1 tumours in each test population. Finally, we performed bootstrap-based RFD to map the replication domains in the respective test populations.

**RNA sequencing (RNA-seq) data quantification**

All paired reads were aligned to Ensembl GRCh37.75 cDNA sequences using kallisto 0.43.1. Additional 100 bootstraps per sample were performed to correct for sequence bias. Transcript-level abundance was subsequently estimated, followed by transcripts per million (TPM) normalization. Aggregated gene-level TPMs were then calculated using sleuth 0.29.0 with default quality-control filters. In total, only around 15,803 genes in SCLC, 16,458 genes in NB, and 14,334 genes in CLL cancers (out of total 34,908 Ensembl genes) were considered expressed in their transcriptomes using median TPM > 1 cutoffs (Extended Data Fig. 11)

To align each Ensembl gene to a RFD domain, we used the position of transcription start site (TSS) to retrieve RFD values from the allocated 1 kb window along the RFD plot in the respective cancer genomes. In total, around 31,612 genes in SCLC, 31,694 genes in NB, and 30,320 genes in CLL cancer transcriptomes were with a mappable RFD value for further analysis.

**Statistical analysis**

Spearman's rank correlation coefficient was used in sequencing read depth correlation analysis, and a Spearman’s rho was given. Wilcoxon rank-sum test wasused to test for differential analysis, and illustrations of **P* < 1E-03, ***P* < 1E-06, ****P* < 1E-09 were given in all figures.

**Data availability**

Tumour replication timing (RT) profiles and RFD domain mappings for each chromosome in the respective primary cancer genomes are available at Mendeley Data <https://data.mendeley.com/datasets/cj3gt6fz7y/draft?a=7b2e4996-2269-4846-91f5-1750eb3d5f6a>

**Code availability**

R scripts purpose-written for this project are available in the public domain at <https://github.com/tsunpo/R> under the GNU General Public License v3.0. Further details on the computational and statistical approaches can be found in code comments.

**Acknowledgement**

We thank Filippo Beleggia and Raheleh Rahbari for comments and suggestions. This work was supported by the German Cancer Aid (Grant no. 110122 to M.F.; the Mildred-Scheel professorship to M.P.), the German Ministry of Science and Education (BMBF) as part of the e:Med initiative (Grant no. 01ZX1901A to J.G., R.K.T., and M.P.), the Deutsche Forschungsgemeinschaft (DFG) as part of the SFB 1399 (to M.C., J.G., R.K.T., M.F., and M.P.), and the Fördergesellschaft Kinderkrebs-Neuroblastom-Forschung e.V. (M.F.).

**Author contributions**

T.-P.Y. and M.P. designed the study and developed the statistical methodology. T.-P.Y. analyzed, interpreted, and visualised the data. J.E. and T.A. performed the flow cytometry experiments. M.C., J.G., R.K.T., and M.F. provided key advice. T.-P.Y. and M.P. wrote the manuscript with contributions from all the authors.
